# Supplementary material
Source: publisher figshare collection journal article supplement (https://acs.figshare.com/ndownloader/files/4585330)
Supplement: Supplementary file 1 [file 4585330]

data_publication_text
_publ_requested_journal          'Cryst.Growth Des.'
_publ_contact_author_name        'Judit Galcera'
_publ_contact_author_address     
;
Institut de Ci\`encia de Materials de Barcelona (ICMAB-CSIC)
Campus UAB
08193 Bellaterra
Spain
;

_publ_contact_author_email       'jgalcera@icmab.es'
loop_
_publ_author_name
_publ_author_address
_publ_author_footnote
'Galcera, Judit'
;
Institut de Ci\`encia de Materials de Barcelona (ICMAB-CSIC)
Campus UAB
08193 Bellaterra
Spain
;
.
'Molins, Elies'
;
Institut de Ci\`encia de Materials de Barcelona (ICMAB-CSIC)
Campus UAB
08193 Bellaterra
Spain
;
.
data_1a_Lamotrigine_hemisuccinate dimethylsufoxide solvate 
 
_audit_creation_method            SHELXL-97
_chemical_name_systematic
;
3,5-diamino-6-(2,3-dichlorophenyl)-1,2,4-triazin-2-ium - succinate - dimethylsolfoxide (1:0.5:1)
;
_chemical_name_common             'Lamotrigine hemisuccinate dimethylsufoxide solvate'
_chemical_melting_point           ?
_chemical_formula_moiety          'C9 H7 Cl2 N5, 0.5(C4 H6 O4), C2 H6 O S'
_chemical_formula_sum
 'C13 H16 Cl2 N5 O3 S'
_chemical_formula_weight          393.27
 
loop_
 _atom_type_symbol
 _atom_type_description
 _atom_type_scat_dispersion_real
 _atom_type_scat_dispersion_imag
 _atom_type_scat_source
 'C'  'C'   0.0033   0.0016
 'International Tables Vol C Tables 4.2.6.8 and 6.1.1.4'
 'H'  'H'   0.0000   0.0000
 'International Tables Vol C Tables 4.2.6.8 and 6.1.1.4'
 'Cl'  'Cl'   0.1484   0.1585
 'International Tables Vol C Tables 4.2.6.8 and 6.1.1.4'
 'N'  'N'   0.0061   0.0033
 'International Tables Vol C Tables 4.2.6.8 and 6.1.1.4'
 'O'  'O'   0.0106   0.0060
 'International Tables Vol C Tables 4.2.6.8 and 6.1.1.4'
 'S'  'S'   0.1246   0.1234
 'International Tables Vol C Tables 4.2.6.8 and 6.1.1.4'
 
_symmetry_cell_setting            monoclinic
_symmetry_space_group_name_H-M    'P 1 21/c 1'
 
loop_
 _symmetry_equiv_pos_as_xyz
 'x, y, z'
 '-x, y+1/2, -z+1/2'
 '-x, -y, -z'
 'x, -y-1/2, z-1/2'
 
_cell_length_a                    11.189(5)
_cell_length_b                    10.705(6)
_cell_length_c                    15.981(7)
_cell_angle_alpha                 90.00
_cell_angle_beta                  109.35(4)
_cell_angle_gamma                 90.00
_cell_volume                      1806.0(15)
_cell_formula_units_Z             4
_cell_measurement_temperature     293(2)
_cell_measurement_reflns_used     25
_cell_measurement_theta_min       9.9
_cell_measurement_theta_max       16.75
 
_exptl_crystal_description        prism
_exptl_crystal_colour             colourless
_exptl_crystal_size_max           0.48
_exptl_crystal_size_mid           0.38
_exptl_crystal_size_min           0.25
_exptl_crystal_density_meas       ?
_exptl_crystal_density_diffrn     1.446
_exptl_crystal_density_method     'not measured'
_exptl_crystal_F_000              812
_exptl_absorpt_coefficient_mu     0.497
_exptl_absorpt_correction_type    none
_exptl_absorpt_correction_T_min   ?
_exptl_absorpt_correction_T_max   ?
_exptl_absorpt_process_details    ?
 
_exptl_special_details
;
 ?
;
 
_diffrn_ambient_temperature       293(2)
_diffrn_radiation_wavelength      0.71073
_diffrn_radiation_type            MoK\a
_diffrn_radiation_source          'fine-focus sealed tube'
_diffrn_radiation_monochromator   graphite
_diffrn_measurement_device_type   'Enraf Nonius CAD4'
_diffrn_measurement_method        'non-profiled omega scans'
_diffrn_detector_area_resol_mean  ?
_diffrn_standards_number          2
_diffrn_standards_interval_count  ?
_diffrn_standards_interval_time   60
_diffrn_standards_decay_%         0
_diffrn_reflns_number             3292
_diffrn_reflns_av_R_equivalents   0.0361
_diffrn_reflns_av_sigmaI/netI     0.0445
_diffrn_reflns_limit_h_min        -13
_diffrn_reflns_limit_h_max        12
_diffrn_reflns_limit_k_min        0
_diffrn_reflns_limit_k_max        12
_diffrn_reflns_limit_l_min        0
_diffrn_reflns_limit_l_max        18
_diffrn_reflns_theta_min          1.93
_diffrn_reflns_theta_max          24.97
_reflns_number_total              3167
_reflns_number_gt                 2126
_reflns_threshold_expression      >2sigma(I)
 
_computing_data_collection        'CAD4 Express (Enraf Nonius, 1994)'
_computing_cell_refinement        'CAD4 Express (Enraf Nonius, 1994)'
_computing_data_reduction         'XCAD4 (Harms & Wocadlo, 1995)'
_computing_structure_solution     'SHELXS-97 (Sheldrick, 1997)'
_computing_structure_refinement   'SHELXL-97 (Sheldrick, 1997)'
_computing_molecular_graphics     'Ortep-3 for Windows (Farrugia, 1997)'
_computing_publication_material   'WinGX publication routines (Farrugia, 1999)'
 
_refine_special_details
;
 Refinement of F^2^ against ALL reflections.  The weighted R-factor wR and
 goodness of fit S are based on F^2^, conventional R-factors R are based
 on F, with F set to zero for negative F^2^. The threshold expression of
 F^2^ > 2sigma(F^2^) is used only for calculating R-factors(gt) etc. and is
 not relevant to the choice of reflections for refinement.  R-factors based
 on F^2^ are statistically about twice as large as those based on F, and R-
 factors based on ALL data will be even larger.
;


_refine_ls_structure_factor_coef  Fsqd
_refine_ls_matrix_type            full
_refine_ls_weighting_scheme       calc
_refine_ls_weighting_details
 'calc w=1/[\s^2^(Fo^2^)+(0.0686P)^2^+0.8078P] where P=(Fo^2^+2Fc^2^)/3'
_atom_sites_solution_primary      direct
_atom_sites_solution_secondary    difmap
_atom_sites_solution_hydrogens    geom
_refine_ls_hydrogen_treatment     mixed
_refine_ls_extinction_method      none
_refine_ls_extinction_coef        ?
_refine_ls_number_reflns          3167
_refine_ls_number_parameters      255
_refine_ls_number_restraints      6
_refine_ls_R_factor_all           0.0940
_refine_ls_R_factor_gt            0.0512
_refine_ls_wR_factor_ref          0.1402
_refine_ls_wR_factor_gt           0.1218
_refine_ls_goodness_of_fit_ref    1.029
_refine_ls_restrained_S_all       1.028
_refine_ls_shift/su_max           0.000
_refine_ls_shift/su_mean          0.000
 
loop_
 _atom_site_label
 _atom_site_type_symbol
 _atom_site_fract_x
 _atom_site_fract_y
 _atom_site_fract_z
 _atom_site_U_iso_or_equiv
 _atom_site_adp_type
 _atom_site_occupancy
 _atom_site_symmetry_multiplicity
 _atom_site_calc_flag
 _atom_site_refinement_flags
 _atom_site_disorder_assembly
 _atom_site_disorder_group
Cl1A Cl 0.95833(10) 0.58777(9) 0.08254(7) 0.0637(3) Uani 1 1 d . . .
Cl2A Cl 1.14218(9) 0.41137(12) 0.22601(8) 0.0815(4) Uani 1 1 d . . .
N1A N 0.6770(2) 0.4556(2) -0.09305(16) 0.0374(6) Uani 1 1 d D . .
N2A N 0.6009(3) 0.5321(2) -0.15591(18) 0.0382(6) Uani 1 1 d D . .
C3A C 0.5553(3) 0.6402(3) -0.13616(19) 0.0359(7) Uani 1 1 d D . .
N3A N 0.4962(3) 0.7165(3) -0.2006(2) 0.0479(8) Uani 1 1 d . . .
N4A N 0.5688(3) 0.6711(2) -0.05168(16) 0.0381(6) Uani 1 1 d D . .
C5A C 0.6368(3) 0.5944(3) 0.01162(19) 0.0348(7) Uani 1 1 d D . .
N5A N 0.6459(3) 0.6182(3) 0.09466(19) 0.0463(8) Uani 1 1 d . . .
C6A C 0.6976(3) 0.4856(3) -0.01112(19) 0.0341(7) Uani 1 1 d D . .
C61A C 0.7851(3) 0.4043(3) 0.05791(19) 0.0337(7) Uani 1 1 d D . .
C62A C 0.9080(3) 0.4429(3) 0.1046(2) 0.0403(8) Uani 1 1 d D . .
C63A C 0.9889(3) 0.3650(4) 0.1680(2) 0.0469(9) Uani 1 1 d D . .
C64A C 0.9469(3) 0.2503(4) 0.1859(2) 0.0539(9) Uani 1 1 d D . .
H64A H 1.0011 0.1983 0.2283 0.065 Uiso 1 1 calc R . .
C65A C 0.8253(3) 0.2132(3) 0.1413(3) 0.0556(10) Uani 1 1 d D . .
H65A H 0.7970 0.1363 0.1545 0.067 Uiso 1 1 calc R . .
C66A C 0.7441(3) 0.2882(3) 0.0770(2) 0.0448(8) Uani 1 1 d D . .
H66A H 0.6621 0.2613 0.0465 0.054 Uiso 1 1 calc R . .
H2A H 0.592(3) 0.514(3) -0.210(2) 0.040(9) Uiso 1 1 d . . .
H31A H 0.498(3) 0.710(3) -0.252(3) 0.047(10) Uiso 1 1 d . . .
H32A H 0.464(4) 0.783(4) -0.189(2) 0.059(12) Uiso 1 1 d . . .
H51A H 0.610(3) 0.692(4) 0.106(2) 0.056(11) Uiso 1 1 d . . .
H52A H 0.692(3) 0.577(3) 0.139(2) 0.044(10) Uiso 1 1 d . . .
O1B O 0.5288(2) 0.6645(2) -0.36337(14) 0.0494(6) Uani 1 1 d . . .
O2B O 0.5760(2) 0.4686(2) -0.32311(14) 0.0464(6) Uani 1 1 d . . .
C1B C 0.5551(3) 0.5560(3) -0.37895(19) 0.0346(7) Uani 1 1 d . . .
C2B C 0.5624(3) 0.5261(3) -0.4699(2) 0.0379(7) Uani 1 1 d . . .
H21B H 0.588(3) 0.600(3) -0.497(2) 0.048(9) Uiso 1 1 d . . .
H22B H 0.636(3) 0.467(3) -0.463(2) 0.055(10) Uiso 1 1 d . . .
S11C S 0.2519(2) -0.0050(2) 0.17241(16) 0.0690(9) Uani 0.482(3) 1 d P A 1
S12C S 0.1336(2) -0.0065(2) 0.14672(14) 0.0678(9) Uani 0.518(3) 1 d P A 2
O1C O 0.1950(4) 0.0242(3) 0.24039(19) 0.0940(11) Uani 1 1 d . . .
C1C C 0.1931(5) -0.1470(5) 0.1233(4) 0.1101(19) Uani 1 1 d . . .
H11C H 0.2227 -0.2129 0.1659 0.165 Uiso 1 1 calc R A 1
H12C H 0.2220 -0.1615 0.0739 0.165 Uiso 1 1 calc R A 1
H13C H 0.1022 -0.1450 0.1030 0.165 Uiso 1 1 calc R A 1
C2C C 0.1872(6) 0.0974(6) 0.0845(4) 0.113(2) Uani 1 1 d . . .
H21C H 0.2123 0.1813 0.1035 0.169 Uiso 1 1 calc R A 1
H22C H 0.0965 0.0913 0.0648 0.169 Uiso 1 1 calc R A 1
H23C H 0.2171 0.0761 0.0365 0.169 Uiso 1 1 calc R A 1
 
loop_
 _atom_site_aniso_label
 _atom_site_aniso_U_11
 _atom_site_aniso_U_22
 _atom_site_aniso_U_33
 _atom_site_aniso_U_23
 _atom_site_aniso_U_13
 _atom_site_aniso_U_12
Cl1A 0.0721(6) 0.0479(6) 0.0722(7) -0.0045(5) 0.0253(5) -0.0232(5)
Cl2A 0.0457(6) 0.0969(9) 0.0837(8) -0.0139(7) -0.0032(5) -0.0081(6)
N1A 0.0494(16) 0.0290(14) 0.0345(15) 0.0003(12) 0.0149(12) 0.0042(12)
N2A 0.0594(18) 0.0294(14) 0.0277(14) -0.0021(12) 0.0167(13) 0.0066(13)
C3A 0.0479(19) 0.0308(17) 0.0310(17) -0.0029(14) 0.0158(14) -0.0026(15)
N3A 0.080(2) 0.0365(17) 0.0277(16) 0.0023(14) 0.0193(15) 0.0151(16)
N4A 0.0570(17) 0.0315(14) 0.0263(13) 0.0003(11) 0.0146(12) 0.0073(13)
C5A 0.0495(19) 0.0278(16) 0.0289(16) -0.0020(13) 0.0154(14) -0.0027(14)
N5A 0.071(2) 0.0384(17) 0.0294(16) 0.0003(14) 0.0172(15) 0.0129(16)
C6A 0.0458(18) 0.0278(16) 0.0298(16) -0.0029(13) 0.0142(14) -0.0040(14)
C61A 0.0411(17) 0.0302(16) 0.0305(16) -0.0015(13) 0.0127(14) 0.0020(14)
C62A 0.0486(19) 0.0363(18) 0.0393(18) -0.0045(15) 0.0190(15) -0.0052(15)
C63A 0.0406(19) 0.056(2) 0.0403(19) -0.0071(17) 0.0080(15) 0.0007(17)
C64A 0.053(2) 0.051(2) 0.050(2) 0.0071(18) 0.0067(17) 0.0141(19)
C65A 0.058(2) 0.040(2) 0.065(2) 0.0149(19) 0.0149(19) -0.0006(17)
C66A 0.0457(19) 0.0357(19) 0.051(2) 0.0016(16) 0.0127(16) -0.0033(16)
O1B 0.0857(18) 0.0329(13) 0.0401(13) 0.0038(10) 0.0349(13) 0.0060(12)
O2B 0.0809(17) 0.0305(12) 0.0282(11) 0.0003(10) 0.0184(11) -0.0032(12)
C1B 0.0405(17) 0.0352(18) 0.0267(16) -0.0022(14) 0.0094(13) -0.0045(14)
C2B 0.0461(19) 0.0386(19) 0.0324(17) 0.0000(15) 0.0177(14) 0.0000(16)
S11C 0.0527(17) 0.0774(17) 0.0749(16) -0.0057(13) 0.0184(11) 0.0009(11)
S12C 0.0695(17) 0.0855(17) 0.0571(13) -0.0201(11) 0.0326(11) -0.0105(12)
O1C 0.139(3) 0.096(2) 0.0447(16) -0.0144(17) 0.0269(18) -0.018(2)
C1C 0.129(5) 0.096(4) 0.105(4) -0.032(4) 0.038(4) 0.009(4)
C2C 0.154(5) 0.118(5) 0.092(4) 0.015(3) 0.075(4) 0.001(4)
 
_geom_special_details
;
 All esds (except the esd in the dihedral angle between two l.s. planes)
 are estimated using the full covariance matrix.  The cell esds are taken
 into account individually in the estimation of esds in distances, angles
 and torsion angles; correlations between esds in cell parameters are only
 used when they are defined by crystal symmetry.  An approximate (isotropic)
 treatment of cell esds is used for estimating esds involving l.s. planes.
;
 
loop_
 _geom_bond_atom_site_label_1
 _geom_bond_atom_site_label_2
 _geom_bond_distance
 _geom_bond_site_symmetry_2
 _geom_bond_publ_flag
Cl1A C62A 1.726(3) . ?
Cl2A C63A 1.730(4) . ?
N1A C6A 1.293(4) . ?
N1A N2A 1.356(4) . ?
N2A C3A 1.343(4) . ?
N2A H2A 0.87(3) . ?
C3A N3A 1.309(4) . ?
C3A N4A 1.349(4) . ?
N3A H31A 0.83(4) . ?
N3A H32A 0.84(4) . ?
N4A C5A 1.329(4) . ?
C5A N5A 1.322(4) . ?
C5A C6A 1.455(4) . ?
N5A H51A 0.93(4) . ?
N5A H52A 0.85(4) . ?
C6A C61A 1.489(4) . ?
C61A C62A 1.393(4) . ?
C61A C66A 1.393(4) . ?
C62A C63A 1.390(5) . ?
C63A C64A 1.378(5) . ?
C64A C65A 1.369(5) . ?
C64A H64A 0.9300 . ?
C65A C66A 1.381(5) . ?
C65A H65A 0.9300 . ?
C66A H66A 0.9300 . ?
O1B C1B 1.244(4) . ?
O2B C1B 1.260(4) . ?
C1B C2B 1.517(4) . ?
C2B C2B 1.515(7) 3_664 ?
C2B H21B 0.99(3) . ?
C2B H22B 1.01(4) . ?
S11C O1C 1.463(4) . ?
S11C C1C 1.736(6) . ?
S11C C2C 1.740(6) . ?
S12C O1C 1.463(4) . ?
S12C C2C 1.727(6) . ?
S12C C1C 1.735(6) . ?
C1C H11C 0.9600 . ?
C1C H12C 0.9600 . ?
C1C H13C 0.9600 . ?
C2C H21C 0.9600 . ?
C2C H22C 0.9600 . ?
C2C H23C 0.9600 . ?
 
loop_
 _geom_angle_atom_site_label_1
 _geom_angle_atom_site_label_2
 _geom_angle_atom_site_label_3
 _geom_angle
 _geom_angle_site_symmetry_1
 _geom_angle_site_symmetry_3
 _geom_angle_publ_flag
C6A N1A N2A 117.2(3) . . ?
C3A N2A N1A 122.7(3) . . ?
C3A N2A H2A 120(2) . . ?
N1A N2A H2A 117(2) . . ?
N3A C3A N2A 119.0(3) . . ?
N3A C3A N4A 119.6(3) . . ?
N2A C3A N4A 121.4(3) . . ?
C3A N3A H31A 124(2) . . ?
C3A N3A H32A 119(3) . . ?
H31A N3A H32A 116(4) . . ?
C5A N4A C3A 117.2(3) . . ?
N5A C5A N4A 118.7(3) . . ?
N5A C5A C6A 121.2(3) . . ?
N4A C5A C6A 120.1(3) . . ?
C5A N5A H51A 118(2) . . ?
C5A N5A H52A 124(2) . . ?
H51A N5A H52A 118(3) . . ?
N1A C6A C5A 120.7(3) . . ?
N1A C6A C61A 117.2(3) . . ?
C5A C6A C61A 122.0(3) . . ?
C62A C61A C66A 119.0(3) . . ?
C62A C61A C6A 120.9(3) . . ?
C66A C61A C6A 120.0(3) . . ?
C63A C62A C61A 120.1(3) . . ?
C63A C62A Cl1A 120.7(3) . . ?
C61A C62A Cl1A 119.2(3) . . ?
C64A C63A C62A 120.1(3) . . ?
C64A C63A Cl2A 119.4(3) . . ?
C62A C63A Cl2A 120.6(3) . . ?
C65A C64A C63A 119.9(3) . . ?
C65A C64A H64A 120.0 . . ?
C63A C64A H64A 120.0 . . ?
C64A C65A C66A 120.9(3) . . ?
C64A C65A H65A 119.5 . . ?
C66A C65A H65A 119.5 . . ?
C65A C66A C61A 119.9(3) . . ?
C65A C66A H66A 120.1 . . ?
C61A C66A H66A 120.1 . . ?
O1B C1B O2B 123.5(3) . . ?
O1B C1B C2B 118.7(3) . . ?
O2B C1B C2B 117.8(3) . . ?
C2B C2B C1B 110.8(3) 3_664 . ?
C2B C2B H21B 111.1(19) 3_664 . ?
C1B C2B H21B 110.9(19) . . ?
C2B C2B H22B 113(2) 3_664 . ?
C1B C2B H22B 108.9(19) . . ?
H21B C2B H22B 102(3) . . ?
O1C S11C C1C 109.3(3) . . ?
O1C S11C C2C 107.3(3) . . ?
C1C S11C C2C 101.1(3) . . ?
O1C S12C C2C 108.0(3) . . ?
O1C S12C C1C 109.4(3) . . ?
C2C S12C C1C 101.7(3) . . ?
S12C O1C S11C 50.55(15) . . ?
S12C C1C S11C 42.18(16) . . ?
S12C C1C H11C 123.5 . . ?
S11C C1C H11C 109.5 . . ?
S12C C1C H12C 125.1 . . ?
S11C C1C H12C 109.5 . . ?
H11C C1C H12C 109.5 . . ?
S12C C1C H13C 67.3 . . ?
S11C C1C H13C 109.5 . . ?
H11C C1C H13C 109.5 . . ?
H12C C1C H13C 109.5 . . ?
S12C C2C S11C 42.24(16) . . ?
S12C C2C H21C 122.7 . . ?
S11C C2C H21C 109.5 . . ?
S12C C2C H22C 67.3 . . ?
S11C C2C H22C 109.5 . . ?
H21C C2C H22C 109.5 . . ?
S12C C2C H23C 125.9 . . ?
S11C C2C H23C 109.5 . . ?
H21C C2C H23C 109.5 . . ?
H22C C2C H23C 109.5 . . ?
 
loop_
 _geom_torsion_atom_site_label_1
 _geom_torsion_atom_site_label_2
 _geom_torsion_atom_site_label_3
 _geom_torsion_atom_site_label_4
 _geom_torsion
 _geom_torsion_site_symmetry_1
 _geom_torsion_site_symmetry_2
 _geom_torsion_site_symmetry_3
 _geom_torsion_site_symmetry_4
 _geom_torsion_publ_flag
C6A N1A N2A C3A 5.0(4) . . . . ?
N1A N2A C3A N3A 171.3(3) . . . . ?
N1A N2A C3A N4A -9.0(5) . . . . ?
N3A C3A N4A C5A -175.6(3) . . . . ?
N2A C3A N4A C5A 4.6(5) . . . . ?
C3A N4A C5A N5A -176.2(3) . . . . ?
C3A N4A C5A C6A 2.7(4) . . . . ?
N2A N1A C6A C5A 2.5(4) . . . . ?
N2A N1A C6A C61A -177.7(3) . . . . ?
N5A C5A C6A N1A 172.4(3) . . . . ?
N4A C5A C6A N1A -6.5(4) . . . . ?
N5A C5A C6A C61A -7.4(5) . . . . ?
N4A C5A C6A C61A 173.7(3) . . . . ?
N1A C6A C61A C62A 104.8(3) . . . . ?
C5A C6A C61A C62A -75.4(4) . . . . ?
N1A C6A C61A C66A -75.7(4) . . . . ?
C5A C6A C61A C66A 104.1(3) . . . . ?
C66A C61A C62A C63A 1.3(4) . . . . ?
C6A C61A C62A C63A -179.1(3) . . . . ?
C66A C61A C62A Cl1A -178.9(2) . . . . ?
C6A C61A C62A Cl1A 0.6(4) . . . . ?
C61A C62A C63A C64A -1.2(5) . . . . ?
Cl1A C62A C63A C64A 179.0(3) . . . . ?
C61A C62A C63A Cl2A 179.5(2) . . . . ?
Cl1A C62A C63A Cl2A -0.2(4) . . . . ?
C62A C63A C64A C65A -0.1(5) . . . . ?
Cl2A C63A C64A C65A 179.2(3) . . . . ?
C63A C64A C65A C66A 1.2(6) . . . . ?
C64A C65A C66A C61A -1.0(5) . . . . ?
C62A C61A C66A C65A -0.3(5) . . . . ?
C6A C61A C66A C65A -179.8(3) . . . . ?
O1B C1B C2B C2B -95.0(4) . . . 3_664 ?
O2B C1B C2B C2B 84.8(4) . . . 3_664 ?
C2C S12C O1C S11C -55.8(3) . . . . ?
C1C S12C O1C S11C 54.1(3) . . . . ?
C1C S11C O1C S12C -54.0(3) . . . . ?
C2C S11C O1C S12C 54.9(3) . . . . ?
O1C S12C C1C S11C -51.7(3) . . . . ?
C2C S12C C1C S11C 62.4(3) . . . . ?
O1C S11C C1C S12C 51.6(2) . . . . ?
C2C S11C C1C S12C -61.4(3) . . . . ?
O1C S12C C2C S11C 53.0(2) . . . . ?
C1C S12C C2C S11C -62.0(3) . . . . ?
O1C S11C C2C S12C -52.7(2) . . . . ?
C1C S11C C2C S12C 61.7(3) . . . . ?
 
loop_
 _geom_hbond_atom_site_label_D
 _geom_hbond_atom_site_label_H
 _geom_hbond_atom_site_label_A
 _geom_hbond_distance_DH
 _geom_hbond_distance_HA
 _geom_hbond_distance_DA
 _geom_hbond_angle_DHA
 _geom_hbond_site_symmetry_A
N2A H2A O2B  0.87(3) 1.82(3) 2.681(3) 177(3) .
N3A H31A O1B  0.83(4) 1.99(4) 2.800(4) 167(3) .
N3A H32A O2B  0.84(4) 2.06(4) 2.877(4) 163(4) 2_654
N5A H51A O1B  0.93(4) 1.93(4) 2.857(4) 175(3) 4_576
N5A H52A O1C  0.85(4) 2.01(4) 2.832(5) 164(3) 2_655
   
_diffrn_measured_fraction_theta_max    1.000
_diffrn_reflns_theta_full              24.97
_diffrn_measured_fraction_theta_full   1.000
_refine_diff_density_max    0.306
_refine_diff_density_min   -0.288
_refine_diff_density_rms    0.058
#= = = END

data_publication_text
_publ_requested_journal          'Cryst.Growth Des.'
_publ_contact_author_name        'Judit Galcera'
_publ_contact_author_address     
;
Institut de Ci\`encia de Materials de Barcelona (ICMAB-CSIC)
Campus UAB
08193 Bellaterra
Spain
;

_publ_contact_author_email       'jgalcera@icmab.es'
loop_
_publ_author_name
_publ_author_address
_publ_author_footnote
'Galcera, Judit'
;
Institut de Ci\`encia de Materials de Barcelona (ICMAB-CSIC)
Campus UAB
08193 Bellaterra
Spain
;
.
'Molins, Elies'
;
Institut de Ci\`encia de Materials de Barcelona (ICMAB-CSIC)
Campus UAB
08193 Bellaterra
Spain
;
.
data_1b_Lamotrigine_hemisuccinate 1,3-dioxolane solvate 
 
_audit_creation_method            SHELXL-97
_chemical_name_systematic
;
3,5-diamino-6-(2,3-dichlorophenyl)-1,2,4-triazin-2-ium - succinate - 
1,3-dioxolane (1:0.5:1)
;
_chemical_name_common             'Lamotrigine hemisuccinate 1,3-dioxolane solvate'
_chemical_melting_point           ?
_chemical_formula_moiety          'C9 H7 Cl2 N5, 0.5(C4 H6 O4), C3 H6 O2'
_chemical_formula_sum
 'C14 H16 Cl2 N5 O4'
_chemical_formula_weight          389.22
 
loop_
 _atom_type_symbol
 _atom_type_description
 _atom_type_scat_dispersion_real
 _atom_type_scat_dispersion_imag
 _atom_type_scat_source
 'C'  'C'   0.0033   0.0016
 'International Tables Vol C Tables 4.2.6.8 and 6.1.1.4'
 'H'  'H'   0.0000   0.0000
 'International Tables Vol C Tables 4.2.6.8 and 6.1.1.4'
 'Cl'  'Cl'   0.1484   0.1585
 'International Tables Vol C Tables 4.2.6.8 and 6.1.1.4'
 'N'  'N'   0.0061   0.0033
 'International Tables Vol C Tables 4.2.6.8 and 6.1.1.4'
 'O'  'O'   0.0106   0.0060
 'International Tables Vol C Tables 4.2.6.8 and 6.1.1.4'
 
_symmetry_cell_setting            monoclinic
_symmetry_space_group_name_H-M    'P 21/c'
 
loop_
 _symmetry_equiv_pos_as_xyz
 'x, y, z'
 '-x, y+1/2, -z+1/2'
 '-x, -y, -z'
 'x, -y-1/2, z-1/2'
 
_cell_length_a                    11.3190(10)
_cell_length_b                    10.574(2)
_cell_length_c                    15.836(2)
_cell_angle_alpha                 90.00
_cell_angle_beta                  109.864(10)
_cell_angle_gamma                 90.00
_cell_volume                      1782.6(4)
_cell_formula_units_Z             4
_cell_measurement_temperature     293(2)
_cell_measurement_reflns_used     25
_cell_measurement_theta_min       33.1
_cell_measurement_theta_max       2
 
_exptl_crystal_description        prism
_exptl_crystal_colour             colourless
_exptl_crystal_size_max           0.46
_exptl_crystal_size_mid           0.41
_exptl_crystal_size_min           0.27
_exptl_crystal_density_meas       ?
_exptl_crystal_density_diffrn     1.450
_exptl_crystal_density_method     'not measured'
_exptl_crystal_F_000              804
_exptl_absorpt_coefficient_mu     0.394
_exptl_absorpt_correction_type    none
_exptl_absorpt_correction_T_min   ?
_exptl_absorpt_correction_T_max   ?
_exptl_absorpt_process_details    ?
 
_exptl_special_details
;
 ?
;
 
_diffrn_ambient_temperature       293(2)
_diffrn_radiation_wavelength      0.71073
_diffrn_radiation_type            MoK\a
_diffrn_radiation_source          'fine-focus sealed tube'
_diffrn_radiation_monochromator   graphite
_diffrn_measurement_device_type   'Enraf Nonius CAD4'
_diffrn_measurement_method        'non-profiled omega/2theta scans'
_diffrn_detector_area_resol_mean  ?
_diffrn_standards_number          3
_diffrn_standards_interval_count  ?
_diffrn_standards_interval_time   120
_diffrn_standards_decay_%         0
_diffrn_reflns_number             2376
_diffrn_reflns_av_R_equivalents   0.1414
_diffrn_reflns_av_sigmaI/netI     0.4241
_diffrn_reflns_limit_h_min        -13
_diffrn_reflns_limit_h_max        12
_diffrn_reflns_limit_k_min        -12
_diffrn_reflns_limit_k_max        0
_diffrn_reflns_limit_l_min        0
_diffrn_reflns_limit_l_max        19
_diffrn_reflns_theta_min          2.74
_diffrn_reflns_theta_max          25.63
_reflns_number_total              2307
_reflns_number_gt                 773
_reflns_threshold_expression      >2sigma(I)
 
_computing_data_collection        'CAD4 Express (Enraf Nonius, 1994)'
_computing_cell_refinement        'CAD4 Express (Enraf Nonius, 1994)'
_computing_data_reduction         'XCAD4 (Harms & Wocadlo, 1995)'
_computing_structure_solution     'SHELXS-86 (Sheldrick, 1986)'
_computing_structure_refinement   'SHELXL-97 (Sheldrick, 1997)'
_computing_molecular_graphics     'Ortep-3 for Windows (Farrugia, 1997)'
_computing_publication_material   'WinGX publication routines (Farrugia, 1999)'
 
_refine_special_details
;
 Refinement of F^2^ against ALL reflections.  The weighted R-factor wR and
 goodness of fit S are based on F^2^, conventional R-factors R are based
 on F, with F set to zero for negative F^2^. The threshold expression of
 F^2^ > 2sigma(F^2^) is used only for calculating R-factors(gt) etc. and is
 not relevant to the choice of reflections for refinement.  R-factors based
 on F^2^ are statistically about twice as large as those based on F, and R-
 factors based on ALL data will be even larger.
;
 
_refine_ls_structure_factor_coef  Fsqd
_refine_ls_matrix_type            full
_refine_ls_weighting_scheme       calc
_refine_ls_weighting_details
 'calc w=1/[\s^2^(Fo^2^)+(0.1096P)^2^+0.0000P] where P=(Fo^2^+2Fc^2^)/3'
_atom_sites_solution_primary      direct
_atom_sites_solution_secondary    difmap
_atom_sites_solution_hydrogens    geom
_refine_ls_hydrogen_treatment     mixed
_refine_ls_extinction_method      none
_refine_ls_extinction_coef        ?
_refine_ls_number_reflns          2307
_refine_ls_number_parameters      225
_refine_ls_number_restraints      16
_refine_ls_R_factor_all           0.3569
_refine_ls_R_factor_gt            0.0727
_refine_ls_wR_factor_ref          0.2398
_refine_ls_wR_factor_gt           0.1617
_refine_ls_goodness_of_fit_ref    0.916
_refine_ls_restrained_S_all       0.914
_refine_ls_shift/su_max           0.000
_refine_ls_shift/su_mean          0.000
 
loop_
 _atom_site_label
 _atom_site_type_symbol
 _atom_site_fract_x
 _atom_site_fract_y
 _atom_site_fract_z
 _atom_site_U_iso_or_equiv
 _atom_site_adp_type
 _atom_site_occupancy
 _atom_site_symmetry_multiplicity
 _atom_site_calc_flag
 _atom_site_refinement_flags
 _atom_site_disorder_assembly
 _atom_site_disorder_group
O11C O 0.2986(15) 0.4780(14) 0.2858(6) 0.060(5) Uiso 0.61(5) 1 d PD A 1
O31C O 0.284(2) 0.513(4) 0.4245(17) 0.130(9) Uiso 0.49(3) 1 d PD A 1
C41C C 0.402(2) 0.549(5) 0.4211(16) 0.114(11) Uiso 0.49(3) 1 d PD A 1
H41C H 0.4589 0.4782 0.4289 0.136 Uiso 0.49(3) 1 calc PR A 1
H42C H 0.4408 0.6160 0.4632 0.136 Uiso 0.49(3) 1 calc PR A 1
O12C O 0.249(3) 0.512(3) 0.2861(13) 0.089(10) Uiso 0.39(5) 1 d PD A 2
O32C O 0.341(2) 0.463(2) 0.4341(13) 0.112(9) Uiso 0.51(3) 1 d PD A 2
C42C C 0.337(3) 0.595(2) 0.4172(13) 0.082(8) Uiso 0.51(3) 1 d PD A 2
H43C H 0.4059 0.6387 0.4612 0.099 Uiso 0.51(3) 1 calc PR A 2
H44C H 0.2579 0.6319 0.4156 0.099 Uiso 0.51(3) 1 calc PR A 2
C5C C 0.3506(18) 0.5940(19) 0.3265(9) 0.126(7) Uani 1 1 d D . .
H51C H 0.2871 0.6589 0.3183 0.151 Uiso 1 1 calc R A 1
H52C H 0.4161 0.6245 0.3050 0.151 Uiso 1 1 calc R A 1
C2C C 0.2533(15) 0.423(2) 0.3527(11) 0.151(12) Uani 1 1 d D . .
H21C H 0.1632 0.4097 0.3282 0.181 Uiso 1 1 calc R A 1
H22C H 0.2942 0.3428 0.3735 0.181 Uiso 1 1 calc R A 1
Cl1A Cl 0.5487(2) 0.9085(3) 0.41768(16) 0.0680(7) Uani 1 1 d . . .
Cl2A Cl 0.3565(2) 1.0880(4) 0.27869(17) 0.0838(10) Uani 1 1 d . . .
N1A N 0.8258(5) 1.0470(6) 0.5957(3) 0.0358(13) Uani 1 1 d D . .
N2A N 0.9041(5) 0.9710(7) 0.6575(3) 0.0382(14) Uani 1 1 d D . .
H2 H 0.9230 0.9904 0.7133 0.046 Uiso 1 1 calc R . .
C3A C 0.9543(6) 0.8657(8) 0.6360(4) 0.0338(15) Uani 1 1 d D . .
N3A N 1.0212(6) 0.7901(7) 0.7002(4) 0.0460(15) Uani 1 1 d . . .
H31A H 1.0324 0.8080 0.7554 0.069 Uiso 1 1 calc R . .
H32A H 1.0537 0.7226 0.6871 0.069 Uiso 1 1 calc R . .
N4A N 0.9409(5) 0.8382(6) 0.5495(3) 0.0401(14) Uani 1 1 d D . .
C5A C 0.8664(6) 0.9142(7) 0.4882(4) 0.0311(13) Uani 1 1 d D . .
N5A N 0.8544(6) 0.8910(7) 0.4027(3) 0.0435(14) Uani 1 1 d . . .
H51A H 0.8943 0.8289 0.3897 0.052 Uiso 1 1 calc R . .
H52A H 0.8068 0.9382 0.3606 0.052 Uiso 1 1 calc R . .
C6A C 0.8042(6) 1.0204(8) 0.5119(4) 0.0350(15) Uani 1 1 d D . .
C61A C 0.7122(7) 1.1010(8) 0.4445(4) 0.0389(16) Uani 1 1 d D . .
C62A C 0.5925(7) 1.0604(8) 0.3979(4) 0.0424(18) Uani 1 1 d D . .
C63A C 0.5082(7) 1.1386(12) 0.3378(5) 0.056(2) Uani 1 1 d D . .
C64A C 0.5436(9) 1.2613(12) 0.3237(6) 0.066(3) Uani 1 1 d D . .
H64A H 0.4858 1.3151 0.2842 0.079 Uiso 1 1 calc R . .
C65A C 0.6639(8) 1.3021(10) 0.3684(5) 0.061(2) Uani 1 1 d D . .
H65A H 0.6893 1.3826 0.3580 0.073 Uiso 1 1 calc R . .
C66A C 0.7462(7) 1.2221(9) 0.4287(5) 0.0481(18) Uani 1 1 d D . .
H66A H 0.8272 1.2503 0.4599 0.058 Uiso 1 1 calc R . .
O1B O 0.9659(6) 0.8286(6) 0.8588(3) 0.0508(15) Uani 1 1 d . . .
O2B O 0.9222(5) 1.0310(6) 0.8248(3) 0.0451(13) Uani 1 1 d . . .
C1B C 0.9430(6) 0.9376(8) 0.8790(4) 0.0336(15) Uani 1 1 d . . .
C2B C 0.9420(6) 0.9658(7) 0.9729(4) 0.0322(13) Uani 1 1 d . . .
H22B H 0.8691 1.0169 0.9688 0.039 Uiso 1 1 calc R . .
H21B H 0.9358 0.8872 1.0027 0.039 Uiso 1 1 calc R . .
 
loop_
 _atom_site_aniso_label
 _atom_site_aniso_U_11
 _atom_site_aniso_U_22
 _atom_site_aniso_U_33
 _atom_site_aniso_U_23
 _atom_site_aniso_U_13
 _atom_site_aniso_U_12
C5C 0.160(14) 0.133(18) 0.089(9) -0.016(12) 0.049(10) -0.022(17)
C2C 0.120(11) 0.19(4) 0.171(18) -0.02(3) 0.090(12) -0.02(2)
Cl1A 0.0738(13) 0.0568(14) 0.0723(14) -0.0062(11) 0.0234(10) -0.0249(12)
Cl2A 0.0470(11) 0.109(2) 0.0763(16) -0.0195(17) -0.0038(9) -0.0089(14)
N1A 0.052(3) 0.028(3) 0.028(3) -0.002(2) 0.014(2) 0.001(3)
N2A 0.060(3) 0.034(3) 0.020(3) 0.003(2) 0.013(2) 0.002(3)
C3A 0.043(3) 0.041(4) 0.023(3) 0.003(3) 0.018(2) 0.004(3)
N3A 0.075(4) 0.035(3) 0.027(3) 0.004(3) 0.016(3) 0.010(3)
N4A 0.064(3) 0.034(3) 0.021(2) -0.004(2) 0.012(2) 0.011(3)
C5A 0.039(3) 0.027(3) 0.027(3) 0.001(3) 0.011(2) -0.001(3)
N5A 0.068(3) 0.040(3) 0.021(2) -0.005(2) 0.013(2) 0.005(3)
C6A 0.048(4) 0.038(4) 0.020(3) -0.001(3) 0.013(3) -0.004(3)
C61A 0.052(4) 0.039(4) 0.027(3) -0.001(3) 0.015(3) 0.001(4)
C62A 0.053(4) 0.046(5) 0.034(3) -0.014(3) 0.022(3) -0.012(4)
C63A 0.044(4) 0.075(6) 0.042(4) -0.011(4) 0.005(3) -0.006(4)
C64A 0.068(5) 0.053(6) 0.063(5) 0.012(5) 0.004(4) 0.012(5)
C65A 0.065(5) 0.049(5) 0.055(5) 0.016(4) 0.002(4) -0.001(5)
C66A 0.041(4) 0.039(4) 0.054(4) 0.003(4) 0.003(3) 0.004(3)
O1B 0.091(4) 0.035(3) 0.035(3) 0.003(2) 0.033(3) 0.004(3)
O2B 0.082(3) 0.034(3) 0.017(2) 0.001(2) 0.014(2) -0.001(3)
C1B 0.044(3) 0.033(4) 0.025(3) -0.004(3) 0.013(2) -0.005(3)
C2B 0.050(3) 0.031(3) 0.018(3) -0.003(2) 0.014(2) -0.006(3)
 
_geom_special_details
;
 All esds (except the esd in the dihedral angle between two l.s. planes)
 are estimated using the full covariance matrix.  The cell esds are taken
 into account individually in the estimation of esds in distances, angles
 and torsion angles; correlations between esds in cell parameters are only
 used when they are defined by crystal symmetry.  An approximate (isotropic)
 treatment of cell esds is used for estimating esds involving l.s. planes.
;
 
loop_
 _geom_bond_atom_site_label_1
 _geom_bond_atom_site_label_2
 _geom_bond_distance
 _geom_bond_site_symmetry_2
 _geom_bond_publ_flag
O11C C5C 1.417(17) . ?
O11C C2C 1.446(16) . ?
O31C C41C 1.40(2) . ?
O31C C2C 1.433(19) . ?
C41C C5C 1.489(19) . ?
C41C H41C 0.9700 . ?
C41C H42C 0.9700 . ?
O12C C2C 1.403(19) . ?
O12C C5C 1.408(18) . ?
O32C C2C 1.398(18) . ?
O32C C42C 1.41(2) . ?
C42C C5C 1.496(17) . ?
C42C H43C 0.9700 . ?
C42C H44C 0.9700 . ?
C5C H51C 0.9700 . ?
C5C H52C 0.9700 . ?
C2C H21C 0.9700 . ?
C2C H22C 0.9700 . ?
Cl1A C62A 1.740(9) . ?
Cl2A C63A 1.738(8) . ?
N1A C6A 1.296(8) . ?
N1A N2A 1.342(9) . ?
N2A C3A 1.346(11) . ?
N2A H2 0.8600 . ?
C3A N3A 1.313(11) . ?
C3A N4A 1.356(8) . ?
N3A H31A 0.8600 . ?
N3A H32A 0.8600 . ?
N4A C5A 1.320(10) . ?
C5A N5A 1.338(9) . ?
C5A C6A 1.441(10) . ?
N5A H51A 0.8600 . ?
N5A H52A 0.8600 . ?
C6A C61A 1.482(10) . ?
C61A C62A 1.373(10) . ?
C61A C66A 1.384(14) . ?
C62A C63A 1.373(15) . ?
C63A C64A 1.397(19) . ?
C64A C65A 1.374(13) . ?
C64A H64A 0.9300 . ?
C65A C66A 1.375(13) . ?
C65A H65A 0.9300 . ?
C66A H66A 0.9300 . ?
O1B C1B 1.247(11) . ?
O2B C1B 1.278(10) . ?
C1B C2B 1.521(8) . ?
C2B C2B 1.488(12) 3_777 ?
C2B H22B 0.9700 . ?
C2B H21B 0.9700 . ?
 
loop_
 _geom_angle_atom_site_label_1
 _geom_angle_atom_site_label_2
 _geom_angle_atom_site_label_3
 _geom_angle
 _geom_angle_site_symmetry_1
 _geom_angle_site_symmetry_3
 _geom_angle_publ_flag
C5C O11C C2C 102.1(12) . . ?
C41C O31C C2C 97(3) . . ?
O31C C41C C5C 94(2) . . ?
O31C C41C H41C 112.9 . . ?
C5C C41C H41C 112.9 . . ?
O31C C41C H42C 112.9 . . ?
C5C C41C H42C 112.9 . . ?
H41C C41C H42C 110.3 . . ?
C2C O12C C5C 104.8(16) . . ?
C2C O32C C42C 99(2) . . ?
O32C C42C C5C 100(2) . . ?
O32C C42C H43C 111.8 . . ?
C5C C42C H43C 111.8 . . ?
O32C C42C H44C 111.8 . . ?
C5C C42C H44C 111.8 . . ?
H43C C42C H44C 109.5 . . ?
O12C C5C O11C 27.6(14) . . ?
O12C C5C C41C 103.8(19) . . ?
O11C C5C C41C 98(2) . . ?
O12C C5C C42C 96.0(18) . . ?
O11C C5C C42C 106.2(15) . . ?
C41C C5C C42C 33.6(17) . . ?
O12C C5C H51C 85.3 . . ?
O11C C5C H51C 112.2 . . ?
C41C C5C H51C 112.2 . . ?
C42C C5C H51C 79.1 . . ?
O12C C5C H52C 130.6 . . ?
O11C C5C H52C 112.2 . . ?
C41C C5C H52C 112.2 . . ?
C42C C5C H52C 132.5 . . ?
H51C C5C H52C 109.8 . . ?
O32C C2C O12C 108.8(18) . . ?
O32C C2C O31C 33.0(15) . . ?
O12C C2C O31C 95(2) . . ?
O32C C2C O11C 103.8(15) . . ?
O12C C2C O11C 27.3(14) . . ?
O31C C2C O11C 105.4(17) . . ?
O32C C2C H21C 137.0 . . ?
O12C C2C H21C 91.9 . . ?
O31C C2C H21C 110.7 . . ?
O11C C2C H21C 110.7 . . ?
O32C C2C H22C 81.1 . . ?
O12C C2C H22C 137.4 . . ?
O31C C2C H22C 110.7 . . ?
O11C C2C H22C 110.7 . . ?
H21C C2C H22C 108.8 . . ?
C6A N1A N2A 117.7(6) . . ?
N1A N2A C3A 122.8(5) . . ?
N1A N2A H2 118.6 . . ?
C3A N2A H2 118.6 . . ?
N3A C3A N2A 119.3(6) . . ?
N3A C3A N4A 119.3(7) . . ?
N2A C3A N4A 121.4(6) . . ?
C3A N3A H31A 120.0 . . ?
C3A N3A H32A 120.0 . . ?
H31A N3A H32A 120.0 . . ?
C5A N4A C3A 115.9(6) . . ?
N4A C5A N5A 116.9(7) . . ?
N4A C5A C6A 122.0(6) . . ?
N5A C5A C6A 121.1(6) . . ?
C5A N5A H51A 120.0 . . ?
C5A N5A H52A 120.0 . . ?
H51A N5A H52A 120.0 . . ?
N1A C6A C5A 119.8(6) . . ?
N1A C6A C61A 117.1(7) . . ?
C5A C6A C61A 123.1(5) . . ?
C62A C61A C66A 118.5(8) . . ?
C62A C61A C6A 122.0(8) . . ?
C66A C61A C6A 119.5(7) . . ?
C63A C62A C61A 120.7(9) . . ?
C63A C62A Cl1A 120.5(6) . . ?
C61A C62A Cl1A 118.8(7) . . ?
C62A C63A C64A 120.1(8) . . ?
C62A C63A Cl2A 121.0(9) . . ?
C64A C63A Cl2A 119.0(9) . . ?
C65A C64A C63A 119.8(9) . . ?
C65A C64A H64A 120.1 . . ?
C63A C64A H64A 120.1 . . ?
C64A C65A C66A 118.9(9) . . ?
C64A C65A H65A 120.6 . . ?
C66A C65A H65A 120.6 . . ?
C65A C66A C61A 122.1(8) . . ?
C65A C66A H66A 119.0 . . ?
C61A C66A H66A 119.0 . . ?
O1B C1B O2B 123.3(6) . . ?
O1B C1B C2B 120.2(7) . . ?
O2B C1B C2B 116.4(7) . . ?
C2B C2B C1B 111.2(6) 3_777 . ?
C2B C2B H22B 109.4 3_777 . ?
C1B C2B H22B 109.4 . . ?
C2B C2B H21B 109.4 3_777 . ?
C1B C2B H21B 109.4 . . ?
H22B C2B H21B 108.0 . . ?
 
loop_
 _geom_torsion_atom_site_label_1
 _geom_torsion_atom_site_label_2
 _geom_torsion_atom_site_label_3
 _geom_torsion_atom_site_label_4
 _geom_torsion
 _geom_torsion_site_symmetry_1
 _geom_torsion_site_symmetry_2
 _geom_torsion_site_symmetry_3
 _geom_torsion_site_symmetry_4
 _geom_torsion_publ_flag
C2C O31C C41C C5C 59(3) . . . . ?
C2C O32C C42C C5C -49(2) . . . . ?
C2C O12C C5C O11C 76(3) . . . . ?
C2C O12C C5C C41C -5(4) . . . . ?
C2C O12C C5C C42C -38(3) . . . . ?
C2C O11C C5C O12C -68.4(18) . . . . ?
C2C O11C C5C C41C 36(2) . . . . ?
C2C O11C C5C C42C 3(2) . . . . ?
O31C C41C C5C O12C -33(4) . . . . ?
O31C C41C C5C O11C -61(3) . . . . ?
O31C C41C C5C C42C 46(2) . . . . ?
O32C C42C C5C O12C 55(3) . . . . ?
O32C C42C C5C O11C 28(3) . . . . ?
O32C C42C C5C C41C -52(3) . . . . ?
C42C O32C C2C O12C 25(3) . . . . ?
C42C O32C C2C O31C -44(2) . . . . ?
C42C O32C C2C O11C 53(2) . . . . ?
C5C O12C C2C O32C 10(3) . . . . ?
C5C O12C C2C O31C 41(3) . . . . ?
C5C O12C C2C O11C -74(2) . . . . ?
C41C O31C C2C O32C 53(3) . . . . ?
C41C O31C C2C O12C -64(3) . . . . ?
C41C O31C C2C O11C -39(3) . . . . ?
C5C O11C C2C O32C -34(2) . . . . ?
C5C O11C C2C O12C 70(2) . . . . ?
C5C O11C C2C O31C 0(2) . . . . ?
C6A N1A N2A C3A -4.0(9) . . . . ?
N1A N2A C3A N3A -174.0(7) . . . . ?
N1A N2A C3A N4A 8.2(10) . . . . ?
N3A C3A N4A C5A 176.1(7) . . . . ?
N2A C3A N4A C5A -6.1(10) . . . . ?
C3A N4A C5A N5A 178.2(6) . . . . ?
C3A N4A C5A C6A 0.5(10) . . . . ?
N2A N1A C6A C5A -1.7(8) . . . . ?
N2A N1A C6A C61A 176.8(6) . . . . ?
N4A C5A C6A N1A 3.5(9) . . . . ?
N5A C5A C6A N1A -174.2(6) . . . . ?
N4A C5A C6A C61A -174.9(7) . . . . ?
N5A C5A C6A C61A 7.5(10) . . . . ?
N1A C6A C61A C62A -104.2(7) . . . . ?
C5A C6A C61A C62A 74.3(8) . . . . ?
N1A C6A C61A C66A 74.5(8) . . . . ?
C5A C6A C61A C66A -107.1(8) . . . . ?
C66A C61A C62A C63A -0.6(9) . . . . ?
C6A C61A C62A C63A 178.0(7) . . . . ?
C66A C61A C62A Cl1A -179.7(6) . . . . ?
C6A C61A C62A Cl1A -1.0(8) . . . . ?
C61A C62A C63A C64A -0.3(11) . . . . ?
Cl1A C62A C63A C64A 178.7(7) . . . . ?
C61A C62A C63A Cl2A -179.9(5) . . . . ?
Cl1A C62A C63A Cl2A -0.9(9) . . . . ?
C62A C63A C64A C65A 1.8(14) . . . . ?
Cl2A C63A C64A C65A -178.6(7) . . . . ?
C63A C64A C65A C66A -2.2(14) . . . . ?
C64A C65A C66A C61A 1.3(14) . . . . ?
C62A C61A C66A C65A 0.2(12) . . . . ?
C6A C61A C66A C65A -178.5(8) . . . . ?
O1B C1B C2B C2B 104.0(9) . . . 3_777 ?
O2B C1B C2B C2B -74.4(9) . . . 3_777 ?
 
loop_
 _geom_hbond_atom_site_label_D
 _geom_hbond_atom_site_label_H
 _geom_hbond_atom_site_label_A
 _geom_hbond_distance_DH
 _geom_hbond_distance_HA
 _geom_hbond_distance_DA
 _geom_hbond_angle_DHA
 _geom_hbond_site_symmetry_A
N2A H2 O2B  0.86 1.82 2.663(6) 166.2 .
N3A H31A O1B  0.86 2.03 2.817(7) 150.9 .
N3A H32A O2B  0.86 2.06 2.871(9) 156.7 2_746
N5A H51A O1B  0.86 1.98 2.839(8) 172.2 4_575
N5A H52A O11C  0.86 2.26 3.040(12) 151.3 2_655
N5A H52A O12C  0.86 2.33 3.09(2) 148.8 2_655
 
_diffrn_measured_fraction_theta_max    0.685
_diffrn_reflns_theta_full              25.63
_diffrn_measured_fraction_theta_full   0.685
_refine_diff_density_max    0.253
_refine_diff_density_min   -0.225
_refine_diff_density_rms    0.058
#= = = END
data_publication_text
_publ_requested_journal          'Cryst.Growth Des.'
_publ_contact_author_name        'Judit Galcera'
_publ_contact_author_address     
;
Institut de Ci\`encia de Materials de Barcelona (ICMAB-CSIC)
Campus UAB
08193 Bellaterra
Spain
;

_publ_contact_author_email       'jgalcera@icmab.es'
loop_
_publ_author_name
_publ_author_address
_publ_author_footnote
'Galcera, Judit'
;
Institut de Ci\`encia de Materials de Barcelona (ICMAB-CSIC)
Campus UAB
08193 Bellaterra
Spain
;
.
'Molins, Elies'
;
Institut de Ci\`encia de Materials de Barcelona (ICMAB-CSIC)
Campus UAB
08193 Bellaterra
Spain
;
.
data_2a_Lamotrigine_hemifumarate dimethylsufoxide solvate 
 
_audit_creation_method            SHELXL-97
_chemical_name_systematic
;
3,5-diamino-6-(2,3-dichlorophenyl)-1,2,4-triazin-2-ium - fumarate - dimethylsolfoxide (1:0.5:1)
;
_chemical_name_common             'Lamotrigine hemifumarate dimethylsufoxide solvate'
_chemical_melting_point           ?
_chemical_formula_moiety          'C9 H7 Cl2 N5, 0.5(C4 H2 O4), C2 H6 O S'
_chemical_formula_sum
 'C13 H15 Cl2 N5 O3 S'
_chemical_formula_weight          392.26
 
loop_
 _atom_type_symbol
 _atom_type_description
 _atom_type_scat_dispersion_real
 _atom_type_scat_dispersion_imag
 _atom_type_scat_source
 'C'  'C'   0.0033   0.0016
 'International Tables Vol C Tables 4.2.6.8 and 6.1.1.4'
 'H'  'H'   0.0000   0.0000
 'International Tables Vol C Tables 4.2.6.8 and 6.1.1.4'
 'N'  'N'   0.0061   0.0033
 'International Tables Vol C Tables 4.2.6.8 and 6.1.1.4'
 'O'  'O'   0.0106   0.0060
 'International Tables Vol C Tables 4.2.6.8 and 6.1.1.4'
 'S'  'S'   0.1246   0.1234
 'International Tables Vol C Tables 4.2.6.8 and 6.1.1.4'
 'Cl'  'Cl'   0.1484   0.1585
 'International Tables Vol C Tables 4.2.6.8 and 6.1.1.4'
 
_symmetry_cell_setting            monoclinic
_symmetry_space_group_name_H-M    'P 21/n'
 
loop_
 _symmetry_equiv_pos_as_xyz
 'x, y, z'
 '-x+1/2, y+1/2, -z+1/2'
 '-x, -y, -z'
 'x-1/2, -y-1/2, z-1/2'
 
_cell_length_a                    10.8470(19)
_cell_length_b                    10.923(4)
_cell_length_c                    15.877(4)
_cell_angle_alpha                 90.00
_cell_angle_beta                  109.062(19)
_cell_angle_gamma                 90.00
_cell_volume                      1778.0(8)
_cell_formula_units_Z             4
_cell_measurement_temperature     293(2)
_cell_measurement_reflns_used     15
_cell_measurement_theta_min       5
_cell_measurement_theta_max       13.15
 
_exptl_crystal_description        prism
_exptl_crystal_colour             colourless
_exptl_crystal_size_max           0.21
_exptl_crystal_size_mid           0.18
_exptl_crystal_size_min           0.06
_exptl_crystal_density_meas       ?
_exptl_crystal_density_diffrn     1.465
_exptl_crystal_density_method     'not measured'
_exptl_crystal_F_000              808
_exptl_absorpt_coefficient_mu     0.504
_exptl_absorpt_correction_type    none
_exptl_absorpt_correction_T_min   ?
_exptl_absorpt_correction_T_max   ?
_exptl_absorpt_process_details    ?
 
_exptl_special_details
;
 ?
;
 
_diffrn_ambient_temperature       293(2)
_diffrn_radiation_wavelength      0.71073
_diffrn_radiation_type            MoK\a
_diffrn_radiation_source          'fine-focus sealed tube'
_diffrn_radiation_monochromator   graphite
_diffrn_measurement_device_type   'Enraf Nonius CAD4'
_diffrn_measurement_method        'non-profiled omega scans'
_diffrn_detector_area_resol_mean  ?
_diffrn_standards_number          2
_diffrn_standards_interval_count  ?
_diffrn_standards_interval_time   60
_diffrn_standards_decay_%         0
_diffrn_reflns_number             3228
_diffrn_reflns_av_R_equivalents   0.1484
_diffrn_reflns_av_sigmaI/netI     0.2560
_diffrn_reflns_limit_h_min        -12
_diffrn_reflns_limit_h_max        12
_diffrn_reflns_limit_k_min        0
_diffrn_reflns_limit_k_max        12
_diffrn_reflns_limit_l_min        0
_diffrn_reflns_limit_l_max        18
_diffrn_reflns_theta_min          2.01
_diffrn_reflns_theta_max          24.98
_reflns_number_total              3111
_reflns_number_gt                 1203
_reflns_threshold_expression      >2sigma(I)
 
_computing_data_collection        'CAD4 Express (Enraf Nonius, 1994)'
_computing_cell_refinement        'CAD4 Express (Enraf Nonius, 1994)'
_computing_data_reduction         'XCAD4 (Harms & Wocadlo, 1995)'
_computing_structure_solution     'SHELXS-97 (Sheldrick, 1997)'
_computing_structure_refinement   'SHELXL-97 (Sheldrick, 1997)'
_computing_molecular_graphics     'Ortep-3 for Windows (Farrugia, 1997)'
_computing_publication_material   'WinGX publication routines (Farrugia, 1999)'
 
_refine_special_details
;
 Refinement of F^2^ against ALL reflections.  The weighted R-factor wR and
 goodness of fit S are based on F^2^, conventional R-factors R are based
 on F, with F set to zero for negative F^2^. The threshold expression of
 F^2^ > 2sigma(F^2^) is used only for calculating R-factors(gt) etc. and is
 not relevant to the choice of reflections for refinement.  R-factors based
 on F^2^ are statistically about twice as large as those based on F, and R-
 factors based on ALL data will be even larger.
;
 
_refine_ls_structure_factor_coef  Fsqd
_refine_ls_matrix_type            full
_refine_ls_weighting_scheme       calc
_refine_ls_weighting_details
 'calc w=1/[\s^2^(Fo^2^)+(0.0434P)^2^+0.0000P] where P=(Fo^2^+2Fc^2^)/3'
_atom_sites_solution_primary      direct
_atom_sites_solution_secondary    difmap
_atom_sites_solution_hydrogens    geom
_refine_ls_hydrogen_treatment     mixed
_refine_ls_extinction_method      none
_refine_ls_extinction_coef        ?
_refine_ls_number_reflns          3111
_refine_ls_number_parameters      251
_refine_ls_number_restraints      8
_refine_ls_R_factor_all           0.2654
_refine_ls_R_factor_gt            0.0775
_refine_ls_wR_factor_ref          0.1560
_refine_ls_wR_factor_gt           0.1166
_refine_ls_goodness_of_fit_ref    0.989
_refine_ls_restrained_S_all       0.996
_refine_ls_shift/su_max           0.000
_refine_ls_shift/su_mean          0.000
 
loop_
 _atom_site_label
 _atom_site_type_symbol
 _atom_site_fract_x
 _atom_site_fract_y
 _atom_site_fract_z
 _atom_site_U_iso_or_equiv
 _atom_site_adp_type
 _atom_site_occupancy
 _atom_site_symmetry_multiplicity
 _atom_site_calc_flag
 _atom_site_refinement_flags
 _atom_site_disorder_assembly
 _atom_site_disorder_group
S12C S 0.4311(5) 0.9582(4) 0.6803(3) 0.0724(18) Uani 0.634(8) 1 d P A 1
S11C S 0.5207(7) 0.9698(6) 0.6503(4) 0.067(3) Uani 0.366(8) 1 d P A 2
O1C O 0.5530(6) 1.0025(5) 0.7430(3) 0.090(2) Uani 1 1 d . . .
C1C C 0.4604(10) 0.8239(8) 0.6324(6) 0.123(4) Uani 1 1 d . . .
H11C H 0.4829 0.7602 0.6765 0.185 Uiso 1 1 calc R A 1
H13C H 0.5311 0.8361 0.6095 0.185 Uiso 1 1 calc R A 1
H12C H 0.3835 0.8007 0.5847 0.185 Uiso 1 1 calc R A 1
C2C C 0.3923(8) 1.0564(8) 0.5859(5) 0.095(3) Uani 1 1 d . . .
H21C H 0.3734 1.1369 0.6026 0.143 Uiso 1 1 calc R A 1
H22C H 0.3175 1.0250 0.5400 0.143 Uiso 1 1 calc R A 1
H23C H 0.4651 1.0602 0.5642 0.143 Uiso 1 1 calc R A 1
Cl1A Cl 0.87877(19) 0.05779(18) 0.90178(13) 0.0598(6) Uani 1 1 d . . .
Cl2A Cl 0.9074(2) -0.1381(2) 0.76455(15) 0.0882(9) Uani 1 1 d . . .
N1A N 0.7755(5) -0.0439(5) 1.0986(3) 0.0334(14) Uani 1 1 d D . .
N2A N 0.7637(5) 0.0401(5) 1.1580(3) 0.0340(14) Uani 1 1 d D . .
C3A C 0.7024(6) 0.1479(6) 1.1337(4) 0.0346(18) Uani 1 1 d D . .
N3A N 0.7118(6) 0.2292(6) 1.1958(4) 0.0385(17) Uani 1 1 d . . .
N4A N 0.6362(5) 0.1734(5) 1.0489(3) 0.0350(14) Uani 1 1 d D . .
C5A C 0.6373(6) 0.0910(6) 0.9895(4) 0.0350(17) Uani 1 1 d D . .
N5A N 0.5648(6) 0.1067(6) 0.9055(4) 0.0437(18) Uani 1 1 d . . .
C6A C 0.7176(6) -0.0189(5) 1.0159(4) 0.0253(16) Uani 1 1 d D . .
C61A C 0.7331(6) -0.1101(6) 0.9494(4) 0.0274(16) Uani 1 1 d D . .
C62A C 0.8055(6) -0.0827(6) 0.8946(4) 0.0328(17) Uani 1 1 d D . .
C63A C 0.8170(6) -0.1699(8) 0.8337(5) 0.049(2) Uani 1 1 d D . .
C64A C 0.7583(7) -0.2834(7) 0.8285(5) 0.052(2) Uani 1 1 d D . .
H64A H 0.7682 -0.3419 0.7887 0.063 Uiso 1 1 calc R . .
C65A C 0.6859(7) -0.3091(7) 0.8822(5) 0.052(2) Uani 1 1 d D . .
H65A H 0.6444 -0.3844 0.8777 0.062 Uiso 1 1 calc R . .
C66A C 0.6739(6) -0.2231(6) 0.9436(4) 0.0393(18) Uani 1 1 d D . .
H66A H 0.6259 -0.2418 0.9809 0.047 Uiso 1 1 calc R . .
H2A H 0.800(6) 0.015(6) 1.2154(17) 0.07(2) Uiso 1 1 d D . .
H31A H 0.777(5) 0.220(5) 1.255(3) 0.022(16) Uiso 1 1 d . . .
H32A H 0.660(6) 0.288(6) 1.178(4) 0.05(3) Uiso 1 1 d . . .
H51A H 0.560(5) 0.055(5) 0.858(4) 0.032(18) Uiso 1 1 d . . .
H52A H 0.522(5) 0.170(5) 0.895(4) 0.020(19) Uiso 1 1 d . . .
O2B O 0.6156(4) 0.4793(4) 0.1678(3) 0.0399(12) Uani 1 1 d . . .
O1B O 0.5959(4) 0.6803(4) 0.1428(3) 0.0388(12) Uani 1 1 d . . .
C1B C 0.5760(6) 0.5701(7) 0.1182(4) 0.0292(16) Uani 1 1 d . . .
C2B C 0.4993(7) 0.5498(6) 0.0221(4) 0.0313(18) Uani 1 1 d . . .
H2B H 0.460(4) 0.614(4) 0.001(3) 0.002(14) Uiso 1 1 d . . .
 
loop_
 _atom_site_aniso_label
 _atom_site_aniso_U_11
 _atom_site_aniso_U_22
 _atom_site_aniso_U_33
 _atom_site_aniso_U_23
 _atom_site_aniso_U_13
 _atom_site_aniso_U_12
S12C 0.056(3) 0.077(3) 0.086(3) 0.013(2) 0.025(2) 0.004(2)
S11C 0.042(5) 0.077(5) 0.071(5) -0.023(4) 0.004(4) -0.012(4)
O1C 0.126(6) 0.083(4) 0.043(3) -0.017(3) 0.002(4) 0.012(4)
C1C 0.159(11) 0.078(7) 0.103(8) -0.041(7) 0.001(8) 0.004(8)
C2C 0.089(7) 0.098(8) 0.087(7) 0.000(6) 0.013(6) 0.018(6)
Cl1A 0.0650(14) 0.0525(13) 0.0655(14) 0.0082(12) 0.0260(11) -0.0190(12)
Cl2A 0.0955(19) 0.120(2) 0.0765(17) -0.0037(16) 0.0648(15) -0.0044(16)
N1A 0.042(4) 0.026(3) 0.030(3) -0.001(3) 0.010(3) 0.009(3)
N2A 0.047(4) 0.025(4) 0.028(4) 0.003(3) 0.010(3) 0.007(3)
C3A 0.046(5) 0.024(4) 0.036(4) -0.011(4) 0.016(4) 0.008(4)
N3A 0.047(4) 0.036(4) 0.019(4) -0.001(3) -0.007(3) 0.012(4)
N4A 0.052(4) 0.026(3) 0.021(3) 0.005(3) 0.003(3) 0.011(3)
C5A 0.034(4) 0.036(5) 0.031(4) 0.008(4) 0.006(4) 0.002(4)
N5A 0.064(5) 0.033(4) 0.024(4) -0.004(3) 0.002(3) 0.022(4)
C6A 0.027(4) 0.025(4) 0.022(4) 0.005(3) 0.005(3) -0.004(3)
C61A 0.031(4) 0.024(4) 0.027(4) 0.001(3) 0.010(3) 0.003(3)
C62A 0.037(4) 0.031(4) 0.032(4) 0.010(4) 0.015(3) -0.001(3)
C63A 0.047(5) 0.059(6) 0.046(5) 0.003(5) 0.024(4) 0.012(5)
C64A 0.066(6) 0.049(6) 0.043(5) -0.015(4) 0.021(4) 0.015(5)
C65A 0.068(6) 0.034(5) 0.058(5) -0.013(4) 0.026(5) -0.010(4)
C66A 0.043(5) 0.038(5) 0.040(4) 0.001(4) 0.017(4) -0.001(4)
O2B 0.062(3) 0.027(3) 0.023(3) 0.004(2) 0.003(2) 0.003(3)
O1B 0.053(3) 0.022(3) 0.027(3) -0.010(2) -0.006(2) 0.008(2)
C1B 0.027(4) 0.035(5) 0.025(4) -0.002(4) 0.008(3) -0.001(4)
C2B 0.040(4) 0.013(4) 0.037(5) 0.005(3) 0.007(4) 0.003(4)
 
_geom_special_details
;
 All esds (except the esd in the dihedral angle between two l.s. planes)
 are estimated using the full covariance matrix.  The cell esds are taken
 into account individually in the estimation of esds in distances, angles
 and torsion angles; correlations between esds in cell parameters are only
 used when they are defined by crystal symmetry.  An approximate (isotropic)
 treatment of cell esds is used for estimating esds involving l.s. planes.
;
 
loop_
 _geom_bond_atom_site_label_1
 _geom_bond_atom_site_label_2
 _geom_bond_distance
 _geom_bond_site_symmetry_2
 _geom_bond_publ_flag
S12C O1C 1.454(6) . ?
S12C C1C 1.729(9) . ?
S12C C2C 1.778(9) . ?
S11C O1C 1.442(8) . ?
S11C C1C 1.711(11) . ?
S11C C2C 1.717(10) . ?
C1C H11C 0.9600 . ?
C1C H13C 0.9600 . ?
C1C H12C 0.9600 . ?
C2C H21C 0.9600 . ?
C2C H22C 0.9600 . ?
C2C H23C 0.9600 . ?
Cl1A C62A 1.715(6) . ?
Cl2A C63A 1.730(7) . ?
N1A C6A 1.287(7) . ?
N1A N2A 1.352(6) . ?
N2A C3A 1.345(7) . ?
N2A H2A 0.908(15) . ?
C3A N3A 1.307(7) . ?
C3A N4A 1.332(7) . ?
N3A H31A 0.97(5) . ?
N3A H32A 0.84(6) . ?
N4A C5A 1.306(7) . ?
C5A N5A 1.319(8) . ?
C5A C6A 1.462(8) . ?
N5A H51A 0.93(5) . ?
N5A H52A 0.82(5) . ?
C6A C61A 1.500(8) . ?
C61A C66A 1.381(8) . ?
C61A C62A 1.381(7) . ?
C62A C63A 1.391(9) . ?
C63A C64A 1.384(9) . ?
C64A C65A 1.363(9) . ?
C64A H64A 0.9300 . ?
C65A C66A 1.390(8) . ?
C65A H65A 0.9300 . ?
C66A H66A 0.9300 . ?
O2B C1B 1.252(7) . ?
O1B C1B 1.262(7) . ?
C1B C2B 1.496(8) . ?
C2B C2B 1.297(12) 3_665 ?
C2B H2B 0.84(4) . ?
 
loop_
 _geom_angle_atom_site_label_1
 _geom_angle_atom_site_label_2
 _geom_angle_atom_site_label_3
 _geom_angle
 _geom_angle_site_symmetry_1
 _geom_angle_site_symmetry_3
 _geom_angle_publ_flag
O1C S12C C1C 109.1(5) . . ?
O1C S12C C2C 106.8(4) . . ?
C1C S12C C2C 99.7(5) . . ?
O1C S11C C1C 110.6(6) . . ?
O1C S11C C2C 110.5(6) . . ?
C1C S11C C2C 102.9(5) . . ?
S11C O1C S12C 49.9(3) . . ?
S11C C1C S12C 41.5(3) . . ?
S11C C1C H11C 124.2 . . ?
S12C C1C H11C 109.5 . . ?
S11C C1C H13C 67.9 . . ?
S12C C1C H13C 109.5 . . ?
H11C C1C H13C 109.5 . . ?
S11C C1C H12C 124.3 . . ?
S12C C1C H12C 109.5 . . ?
H11C C1C H12C 109.5 . . ?
H13C C1C H12C 109.5 . . ?
S11C C2C S12C 40.8(3) . . ?
S11C C2C H21C 123.0 . . ?
S12C C2C H21C 109.5 . . ?
S11C C2C H22C 125.1 . . ?
S12C C2C H22C 109.5 . . ?
H21C C2C H22C 109.5 . . ?
S11C C2C H23C 68.7 . . ?
S12C C2C H23C 109.5 . . ?
H21C C2C H23C 109.5 . . ?
H22C C2C H23C 109.5 . . ?
C6A N1A N2A 116.3(5) . . ?
C3A N2A N1A 123.0(5) . . ?
C3A N2A H2A 124(4) . . ?
N1A N2A H2A 113(4) . . ?
N3A C3A N4A 120.3(6) . . ?
N3A C3A N2A 117.9(6) . . ?
N4A C3A N2A 121.8(6) . . ?
C3A N3A H31A 120(3) . . ?
C3A N3A H32A 113(4) . . ?
H31A N3A H32A 126(6) . . ?
C5A N4A C3A 117.2(5) . . ?
N4A C5A N5A 119.8(7) . . ?
N4A C5A C6A 120.2(6) . . ?
N5A C5A C6A 120.0(7) . . ?
C5A N5A H51A 127(3) . . ?
C5A N5A H52A 116(4) . . ?
H51A N5A H52A 118(5) . . ?
N1A C6A C5A 120.9(6) . . ?
N1A C6A C61A 116.6(6) . . ?
C5A C6A C61A 122.4(5) . . ?
C66A C61A C62A 119.9(6) . . ?
C66A C61A C6A 118.9(5) . . ?
C62A C61A C6A 121.1(6) . . ?
C61A C62A C63A 119.2(6) . . ?
C61A C62A Cl1A 119.9(5) . . ?
C63A C62A Cl1A 120.9(5) . . ?
C64A C63A C62A 120.7(6) . . ?
C64A C63A Cl2A 119.2(6) . . ?
C62A C63A Cl2A 120.1(6) . . ?
C65A C64A C63A 119.7(7) . . ?
C65A C64A H64A 120.2 . . ?
C63A C64A H64A 120.2 . . ?
C64A C65A C66A 120.3(7) . . ?
C64A C65A H65A 119.8 . . ?
C66A C65A H65A 119.8 . . ?
C61A C66A C65A 120.2(6) . . ?
C61A C66A H66A 119.9 . . ?
C65A C66A H66A 119.9 . . ?
O2B C1B O1B 124.8(6) . . ?
O2B C1B C2B 119.1(6) . . ?
O1B C1B C2B 116.1(6) . . ?
C2B C2B C1B 125.1(9) 3_665 . ?
C2B C2B H2B 126(3) 3_665 . ?
C1B C2B H2B 109(3) . . ?
 
loop_
 _geom_torsion_atom_site_label_1
 _geom_torsion_atom_site_label_2
 _geom_torsion_atom_site_label_3
 _geom_torsion_atom_site_label_4
 _geom_torsion
 _geom_torsion_site_symmetry_1
 _geom_torsion_site_symmetry_2
 _geom_torsion_site_symmetry_3
 _geom_torsion_site_symmetry_4
 _geom_torsion_publ_flag
C1C S11C O1C S12C -55.1(6) . . . . ?
C2C S11C O1C S12C 58.2(5) . . . . ?
C1C S12C O1C S11C 53.5(5) . . . . ?
C2C S12C O1C S11C -53.4(5) . . . . ?
O1C S11C C1C S12C 52.6(5) . . . . ?
C2C S11C C1C S12C -65.5(5) . . . . ?
O1C S12C C1C S11C -51.3(5) . . . . ?
C2C S12C C1C S11C 60.3(5) . . . . ?
O1C S11C C2C S12C -54.3(5) . . . . ?
C1C S11C C2C S12C 63.8(5) . . . . ?
O1C S12C C2C S11C 52.0(5) . . . . ?
C1C S12C C2C S11C -61.5(5) . . . . ?
C6A N1A N2A C3A -4.0(8) . . . . ?
N1A N2A C3A N3A -170.8(6) . . . . ?
N1A N2A C3A N4A 7.7(9) . . . . ?
N3A C3A N4A C5A 175.9(6) . . . . ?
N2A C3A N4A C5A -2.6(9) . . . . ?
C3A N4A C5A N5A 174.4(6) . . . . ?
C3A N4A C5A C6A -5.1(9) . . . . ?
N2A N1A C6A C5A -3.8(8) . . . . ?
N2A N1A C6A C61A 178.4(5) . . . . ?
N4A C5A C6A N1A 8.6(9) . . . . ?
N5A C5A C6A N1A -170.8(6) . . . . ?
N4A C5A C6A C61A -173.7(5) . . . . ?
N5A C5A C6A C61A 6.9(9) . . . . ?
N1A C6A C61A C66A 69.2(7) . . . . ?
C5A C6A C61A C66A -108.5(7) . . . . ?
N1A C6A C61A C62A -110.6(6) . . . . ?
C5A C6A C61A C62A 71.7(7) . . . . ?
C66A C61A C62A C63A 0.4(8) . . . . ?
C6A C61A C62A C63A -179.8(6) . . . . ?
C66A C61A C62A Cl1A 179.9(5) . . . . ?
C6A C61A C62A Cl1A -0.3(7) . . . . ?
C61A C62A C63A C64A -0.8(9) . . . . ?
Cl1A C62A C63A C64A 179.6(5) . . . . ?
C61A C62A C63A Cl2A -179.8(5) . . . . ?
Cl1A C62A C63A Cl2A 0.6(7) . . . . ?
C62A C63A C64A C65A 1.6(10) . . . . ?
Cl2A C63A C64A C65A -179.4(5) . . . . ?
C63A C64A C65A C66A -1.8(11) . . . . ?
C62A C61A C66A C65A -0.6(9) . . . . ?
C6A C61A C66A C65A 179.6(6) . . . . ?
C64A C65A C66A C61A 1.3(10) . . . . ?
O2B C1B C2B C2B -21.5(12) . . . 3_665 ?
O1B C1B C2B C2B 158.4(9) . . . 3_665 ?
 
loop_
 _geom_hbond_atom_site_label_D
 _geom_hbond_atom_site_label_H
 _geom_hbond_atom_site_label_A
 _geom_hbond_distance_DH
 _geom_hbond_distance_HA
 _geom_hbond_distance_DA
 _geom_hbond_angle_DHA
 _geom_hbond_site_symmetry_A
N2A H2A O2B  0.908(15) 1.823(18) 2.727(7) 174(7) 2_646
N3A H31A O1B  0.97(5) 1.81(5) 2.777(7) 171(4) 2_646
N3A H32A O2B  0.84(6) 2.13(6) 2.906(8) 152(6) 1_556
N5A H52A O1B  0.82(5) 2.05(6) 2.858(8) 175(6) 3_666
N5A H51A O1C  0.93(5) 1.89(5) 2.785(8) 160(5) 1_545
 
_diffrn_measured_fraction_theta_max    0.999
_diffrn_reflns_theta_full              24.98
_diffrn_measured_fraction_theta_full   0.999
_refine_diff_density_max    0.310
_refine_diff_density_min   -0.325
_refine_diff_density_rms    0.077
#= = = END

data_publication_text
_publ_requested_journal          'Cryst.Growth Des.'
_publ_contact_author_name        'Judit Galcera'
_publ_contact_author_address     
;
Institut de Ci\`encia de Materials de Barcelona (ICMAB-CSIC)
Campus UAB
08193 Bellaterra
Spain
;

_publ_contact_author_email       'jgalcera@icmab.es'
loop_
_publ_author_name
_publ_author_address
_publ_author_footnote
'Galcera, Judit'
;
Institut de Ci\`encia de Materials de Barcelona (ICMAB-CSIC)
Campus UAB
08193 Bellaterra
Spain
;
.
'Molins, Elies'
;
Institut de Ci\`encia de Materials de Barcelona (ICMAB-CSIC)
Campus UAB
08193 Bellaterra
Spain
;
.
data_3a_Lamotrigine_DL-hemitartrate dimethylsufoxide solvate 
 
_audit_creation_method            SHELXL-97
_chemical_name_systematic
;
3,5-diamino-6-(2,3-dichlorophenyl)-1,2,4-triazin-2-ium - dl-tartrate - dimethylsolfoxide (1:0.5:1)
;
_chemical_name_common             'Lamotrigine DL-hemitartrate dimethylsufoxide solvate'
_chemical_melting_point           ?
_chemical_formula_moiety          'C9 H7 Cl2 N5, 0.5(C4 H4 O6), C2 H6 O S'
_chemical_formula_sum
 'C13 H16 Cl2 N5 O4 S'
_chemical_formula_weight          409.27
 
loop_
 _atom_type_symbol
 _atom_type_description
 _atom_type_scat_dispersion_real
 _atom_type_scat_dispersion_imag
 _atom_type_scat_source
 'C'  'C'   0.0033   0.0016
 'International Tables Vol C Tables 4.2.6.8 and 6.1.1.4'
 'H'  'H'   0.0000   0.0000
 'International Tables Vol C Tables 4.2.6.8 and 6.1.1.4'
 'N'  'N'   0.0061   0.0033
 'International Tables Vol C Tables 4.2.6.8 and 6.1.1.4'
 'O'  'O'   0.0106   0.0060
 'International Tables Vol C Tables 4.2.6.8 and 6.1.1.4'
 'S'  'S'   0.1246   0.1234
 'International Tables Vol C Tables 4.2.6.8 and 6.1.1.4'
 'Cl'  'Cl'   0.1484   0.1585
 'International Tables Vol C Tables 4.2.6.8 and 6.1.1.4'
 
_symmetry_cell_setting            monoclinic
_symmetry_space_group_name_H-M    'P 21/c'
 
loop_
 _symmetry_equiv_pos_as_xyz
 'x, y, z'
 '-x, y+1/2, -z+1/2'
 '-x, -y, -z'
 'x, -y-1/2, z-1/2'
 
_cell_length_a                    11.249
_cell_length_b                    11.033
_cell_length_c                    15.800
_cell_angle_alpha                 90.00
_cell_angle_beta                  108.40
_cell_angle_gamma                 90.00
_cell_volume                      1860.7
_cell_formula_units_Z             4
_cell_measurement_temperature     293(2)
_cell_measurement_reflns_used     25
_cell_measurement_theta_min       7.975
_cell_measurement_theta_max       16.48
 
_exptl_crystal_description        prism
_exptl_crystal_colour             colourless
_exptl_crystal_size_max           0.39
_exptl_crystal_size_mid           0.21
_exptl_crystal_size_min           0.15
_exptl_crystal_density_meas       ?
_exptl_crystal_density_diffrn     1.461
_exptl_crystal_density_method     'not measured'
_exptl_crystal_F_000              844
_exptl_absorpt_coefficient_mu     0.489
_exptl_absorpt_correction_type    none
_exptl_absorpt_correction_T_min   ?
_exptl_absorpt_correction_T_max   ?
_exptl_absorpt_process_details    ?
 
_exptl_special_details
;
 ?
;
 
_diffrn_ambient_temperature       293(2)
_diffrn_radiation_wavelength      0.71073
_diffrn_radiation_type            MoK\a
_diffrn_radiation_source          'fine-focus sealed tube'
_diffrn_radiation_monochromator   graphite
_diffrn_measurement_device_type   'Enraf Nonius CAD4'
_diffrn_measurement_method        'non-profiled omega scans'
_diffrn_detector_area_resol_mean  ?
_diffrn_standards_number          1
_diffrn_standards_interval_count  ?
_diffrn_standards_interval_time   60
_diffrn_standards_decay_%         0
_diffrn_reflns_number             3403
_diffrn_reflns_av_R_equivalents   0.0399
_diffrn_reflns_av_sigmaI/netI     0.0957
_diffrn_reflns_limit_h_min        -13
_diffrn_reflns_limit_h_max        12
_diffrn_reflns_limit_k_min        0
_diffrn_reflns_limit_k_max        13
_diffrn_reflns_limit_l_min        0
_diffrn_reflns_limit_l_max        18
_diffrn_reflns_theta_min          1.91
_diffrn_reflns_theta_max          24.97
_reflns_number_total              3272
_reflns_number_gt                 1732
_reflns_threshold_expression      >2sigma(I)
 
_computing_data_collection        'CAD4 Express (Enraf Nonius, 1994)'
_computing_cell_refinement        'CAD4 Express (Enraf Nonius, 1994)'
_computing_data_reduction         'XCAD4 (Harms & Wocadlo, 1995)'
_computing_structure_solution     'SHELXS-97 (Sheldrick, 1997)'
_computing_structure_refinement   'SHELXL-97 (Sheldrick, 1997)'
_computing_molecular_graphics     'Ortep-3 for Windows (Farrugia, 1997)'
_computing_publication_material   'WinGX publication routines (Farrugia, 1999)'
 
_refine_special_details
;
 Refinement of F^2^ against ALL reflections.  The weighted R-factor wR and
 goodness of fit S are based on F^2^, conventional R-factors R are based
 on F, with F set to zero for negative F^2^. The threshold expression of
 F^2^ > 2sigma(F^2^) is used only for calculating R-factors(gt) etc. and is
 not relevant to the choice of reflections for refinement.  R-factors based
 on F^2^ are statistically about twice as large as those based on F, and R-
 factors based on ALL data will be even larger.
;
 
_refine_ls_structure_factor_coef  Fsqd
_refine_ls_matrix_type            full
_refine_ls_weighting_scheme       calc
_refine_ls_weighting_details
 'calc w=1/[\s^2^(Fo^2^)+(0.0364P)^2^+2.4482P] where P=(Fo^2^+2Fc^2^)/3'
_atom_sites_solution_primary      direct
_atom_sites_solution_secondary    difmap
_atom_sites_solution_hydrogens    geom
_refine_ls_hydrogen_treatment     mixed
_refine_ls_extinction_method      none
_refine_ls_extinction_coef        ?
_refine_ls_number_reflns          3272
_refine_ls_number_parameters      251
_refine_ls_number_restraints      6
_refine_ls_R_factor_all           0.1659
_refine_ls_R_factor_gt            0.0730
_refine_ls_wR_factor_ref          0.1540
_refine_ls_wR_factor_gt           0.1279
_refine_ls_goodness_of_fit_ref    1.052
_refine_ls_restrained_S_all       1.052
_refine_ls_shift/su_max           0.000
_refine_ls_shift/su_mean          0.000
 
loop_
 _atom_site_label
 _atom_site_type_symbol
 _atom_site_fract_x
 _atom_site_fract_y
 _atom_site_fract_z
 _atom_site_U_iso_or_equiv
 _atom_site_adp_type
 _atom_site_occupancy
 _atom_site_symmetry_multiplicity
 _atom_site_calc_flag
 _atom_site_refinement_flags
 _atom_site_disorder_assembly
 _atom_site_disorder_group
Cl1A Cl 0.54167(15) 0.10402(14) 0.41898(11) 0.0764(5) Uani 1 1 d . . .
Cl2A Cl 0.35863(15) -0.06028(19) 0.27237(12) 0.0999(7) Uani 1 1 d . . .
N1A N 0.8223(4) -0.0345(3) 0.5903(3) 0.0423(10) Uani 1 1 d D . .
N2A N 0.8993(4) 0.0369(4) 0.6536(3) 0.0451(11) Uani 1 1 d D . .
C5A C 0.8578(5) 0.1050(4) 0.4866(3) 0.0409(12) Uani 1 1 d D . .
N5A N 0.8479(4) 0.1329(4) 0.4034(2) 0.0584(13) Uani 1 1 d . . .
H51A H 0.8854 0.1959 0.3922 0.070 Uiso 1 1 calc R . .
H52A H 0.8038 0.0880 0.3604 0.070 Uiso 1 1 calc R . .
N4A N 0.9276(4) 0.1780(4) 0.5510(2) 0.0459(11) Uani 1 1 d D . .
C3A C 0.9427(5) 0.1437(5) 0.6352(3) 0.0429(13) Uani 1 1 d D . .
N3A N 1.0013(4) 0.2151(4) 0.7016(3) 0.0577(13) Uani 1 1 d . . .
H32A H 1.0300 0.2838 0.6911 0.069 Uiso 1 1 calc R . .
H31A H 1.0111 0.1933 0.7556 0.069 Uiso 1 1 calc R . .
C6A C 0.7980(4) 0.0000(4) 0.5083(3) 0.0370(11) Uani 1 1 d D . .
C61A C 0.7084(5) -0.0759(4) 0.4391(3) 0.0394(12) Uani 1 1 d D . .
C62A C 0.5890(5) -0.0360(4) 0.3935(3) 0.0439(12) Uani 1 1 d D . .
C63A C 0.5084(5) -0.1087(6) 0.3302(3) 0.0559(15) Uani 1 1 d D . .
C64A C 0.5470(6) -0.2210(6) 0.3108(4) 0.0717(18) Uani 1 1 d D . .
H64A H 0.4932 -0.2696 0.2672 0.086 Uiso 1 1 calc R . .
C65A C 0.6639(6) -0.2597(5) 0.3559(5) 0.087(2) Uani 1 1 d D . .
H65A H 0.6899 -0.3360 0.3438 0.104 Uiso 1 1 calc R . .
C66A C 0.7443(5) -0.1884(5) 0.4190(4) 0.0686(17) Uani 1 1 d D . .
H66A H 0.8246 -0.2164 0.4487 0.082 Uiso 1 1 calc R . .
H2A H 0.920(5) 0.009(5) 0.715(4) 0.073(17) Uiso 1 1 d . . .
C1B C 0.9449(5) 0.4526(6) 0.3767(3) 0.0536(15) Uani 1 1 d . . .
C2B C 0.9364(5) 0.4889(8) 0.4679(4) 0.0732(19) Uani 0.50 1 d P . 1
H21B H 0.9075 0.4153 0.4902 0.088 Uiso 0.50 1 calc PR . 1
C2B' C 0.9364(5) 0.4889(8) 0.4679(4) 0.0732(19) Uani 0.50 1 d P . 2
H22B H 0.8990 0.5700 0.4576 0.088 Uiso 0.50 1 calc PR . 2
O1B O 0.9641(4) 0.3464(4) 0.3632(2) 0.0818(14) Uani 1 1 d . . .
O2B O 0.9298(4) 0.5351(4) 0.3205(2) 0.0712(12) Uani 1 1 d . . .
O31B O 0.8605(7) 0.5650(7) 0.4701(5) 0.062(2) Uani 0.50 1 d P A 1
H31B H 0.8448 0.6073 0.4253 0.093 Uiso 0.50 1 calc PR A 1
O32B O 0.8617(7) 0.4295(6) 0.4981(5) 0.0518(18) Uani 0.50 1 d P B 2
H32B H 0.8901 0.3615 0.5129 0.078 Uiso 0.50 1 calc PR B 2
O1C O 0.6936(5) 0.0409(4) 0.2406(3) 0.1071(17) Uani 1 1 d . . .
C1C' C 0.6954(8) -0.1218(7) 0.1230(5) 0.129(3) Uani 0.663(5) 1 d P C 1
H1C1 H 0.7342 -0.1836 0.1655 0.193 Uiso 0.663(5) 1 calc PR C 1
H1C2 H 0.7174 -0.1333 0.0696 0.193 Uiso 0.663(5) 1 calc PR C 1
H1C3 H 0.6061 -0.1265 0.1091 0.193 Uiso 0.663(5) 1 calc PR C 1
C2C' C 0.6666(9) 0.1148(8) 0.0819(5) 0.136(3) Uani 0.663(5) 1 d P C 1
H2C1 H 0.6883 0.1972 0.0994 0.204 Uiso 0.663(5) 1 calc PR C 1
H2C2 H 0.5780 0.1037 0.0693 0.204 Uiso 0.663(5) 1 calc PR C 1
H2C3 H 0.6890 0.0966 0.0295 0.204 Uiso 0.663(5) 1 calc PR C 1
S11C S 0.7467(3) 0.0186(3) 0.16762(17) 0.0849(13) Uani 0.663(5) 1 d P C 1
C2C C 0.6666(9) 0.1148(8) 0.0819(5) 0.136(3) Uani 0.337(5) 1 d P C 2
H2C4 H 0.6358 0.1920 0.0936 0.204 Uiso 0.337(5) 1 calc PR C 2
H2C5 H 0.6271 0.0933 0.0205 0.204 Uiso 0.337(5) 1 calc PR C 2
H2C6 H 0.7556 0.1193 0.0939 0.204 Uiso 0.337(5) 1 calc PR C 2
C1C C 0.6954(8) -0.1218(7) 0.1230(5) 0.129(3) Uani 0.337(5) 1 d P C 2
H1C4 H 0.6796 -0.1872 0.1581 0.193 Uiso 0.337(5) 1 calc PR C 2
H1C5 H 0.7842 -0.1120 0.1357 0.193 Uiso 0.337(5) 1 calc PR C 2
H1C6 H 0.6576 -0.1396 0.0608 0.193 Uiso 0.337(5) 1 calc PR C 2
S12C S 0.6335(6) 0.0081(5) 0.1484(3) 0.074(2) Uani 0.337(5) 1 d P C 2
 
loop_
 _atom_site_aniso_label
 _atom_site_aniso_U_11
 _atom_site_aniso_U_22
 _atom_site_aniso_U_33
 _atom_site_aniso_U_23
 _atom_site_aniso_U_13
 _atom_site_aniso_U_12
Cl1A 0.0784(11) 0.0627(10) 0.0847(11) 0.0010(9) 0.0211(9) 0.0257(9)
Cl2A 0.0539(10) 0.1321(17) 0.0926(13) 0.0125(12) -0.0068(9) 0.0027(10)
N1A 0.054(3) 0.033(2) 0.036(2) 0.003(2) 0.010(2) -0.004(2)
N2A 0.062(3) 0.045(3) 0.027(2) 0.005(2) 0.011(2) -0.001(2)
C5A 0.057(3) 0.036(3) 0.031(3) 0.002(2) 0.015(2) 0.001(3)
N5A 0.098(4) 0.047(3) 0.031(2) -0.005(2) 0.020(2) -0.033(3)
N4A 0.065(3) 0.046(3) 0.029(2) -0.005(2) 0.018(2) -0.019(2)
C3A 0.053(3) 0.043(3) 0.034(3) 0.002(3) 0.016(3) -0.004(3)
N3A 0.085(3) 0.056(3) 0.031(2) -0.007(2) 0.016(2) -0.022(3)
C6A 0.047(3) 0.031(3) 0.035(3) 0.000(2) 0.016(2) -0.001(2)
C61A 0.049(3) 0.031(3) 0.039(3) 0.000(2) 0.014(2) -0.005(2)
C62A 0.045(3) 0.046(3) 0.043(3) 0.003(3) 0.017(3) 0.003(3)
C63A 0.046(3) 0.074(4) 0.046(3) 0.011(3) 0.011(3) -0.004(3)
C64A 0.064(4) 0.070(5) 0.068(4) -0.022(4) 0.001(3) -0.021(4)
C65A 0.074(4) 0.046(4) 0.113(6) -0.035(4) -0.008(4) 0.001(3)
C66A 0.062(4) 0.041(4) 0.086(4) -0.016(3) 0.000(3) 0.000(3)
C1B 0.050(3) 0.080(5) 0.033(3) -0.021(3) 0.017(3) -0.018(3)
C2B 0.051(4) 0.119(6) 0.050(4) -0.021(4) 0.016(3) -0.012(4)
C2B' 0.051(4) 0.119(6) 0.050(4) -0.021(4) 0.016(3) -0.012(4)
O1B 0.164(4) 0.048(3) 0.048(2) -0.015(2) 0.054(3) -0.037(3)
O2B 0.109(3) 0.062(3) 0.033(2) -0.008(2) 0.009(2) 0.014(2)
O31B 0.060(5) 0.071(6) 0.053(5) -0.004(4) 0.015(4) 0.022(5)
O32B 0.055(5) 0.055(5) 0.053(5) -0.002(4) 0.026(4) -0.005(4)
O1C 0.150(4) 0.123(4) 0.046(3) -0.015(3) 0.028(3) -0.045(3)
C1C' 0.155(8) 0.123(7) 0.106(6) -0.031(5) 0.037(6) -0.002(6)
C2C' 0.173(8) 0.153(8) 0.094(6) 0.031(6) 0.058(6) 0.000(7)
S11C 0.063(2) 0.128(3) 0.0620(17) -0.0087(17) 0.0170(14) -0.0186(17)
C2C 0.173(8) 0.153(8) 0.094(6) 0.031(6) 0.058(6) 0.000(7)
C1C 0.155(8) 0.123(7) 0.106(6) -0.031(5) 0.037(6) -0.002(6)
S12C 0.073(5) 0.093(4) 0.065(4) -0.019(3) 0.034(3) -0.014(3)
 
_geom_special_details
;
 All esds (except the esd in the dihedral angle between two l.s. planes)
 are estimated using the full covariance matrix.  The cell esds are taken
 into account individually in the estimation of esds in distances, angles
 and torsion angles; correlations between esds in cell parameters are only
 used when they are defined by crystal symmetry.  An approximate (isotropic)
 treatment of cell esds is used for estimating esds involving l.s. planes.
;
 
loop_
 _geom_bond_atom_site_label_1
 _geom_bond_atom_site_label_2
 _geom_bond_distance
 _geom_bond_site_symmetry_2
 _geom_bond_publ_flag
Cl1A C62A 1.722(5) . ?
Cl2A C63A 1.728(5) . ?
N1A C6A 1.294(5) . ?
N1A N2A 1.351(5) . ?
N2A C3A 1.341(6) . ?
N2A H2A 0.98(5) . ?
C5A N5A 1.321(5) . ?
C5A N4A 1.340(6) . ?
C5A C6A 1.434(6) . ?
N5A H51A 0.8600 . ?
N5A H52A 0.8600 . ?
N4A C3A 1.341(5) . ?
C3A N3A 1.311(6) . ?
N3A H32A 0.8600 . ?
N3A H31A 0.8600 . ?
C6A C61A 1.490(6) . ?
C61A C66A 1.374(7) . ?
C61A C62A 1.380(6) . ?
C62A C63A 1.377(7) . ?
C63A C64A 1.379(8) . ?
C64A C65A 1.353(8) . ?
C64A H64A 0.9300 . ?
C65A C66A 1.363(7) . ?
C65A H65A 0.9300 . ?
C66A H66A 0.9300 . ?
C1B O1B 1.222(6) . ?
C1B O2B 1.245(6) . ?
C1B C2B 1.528(7) . ?
C2B O31B 1.206(8) . ?
C2B C2B 1.489(10) 3_766 ?
C2B H21B 0.9800 . ?
O31B H31B 0.8200 . ?
O32B H32B 0.8200 . ?
O1C S12C 1.445(6) . ?
O1C S11C 1.477(5) . ?
C1C' S11C 1.723(8) . ?
C1C' H1C1 0.9600 . ?
C1C' H1C2 0.9600 . ?
C1C' H1C3 0.9600 . ?
C2C' S11C 1.733(8) . ?
C2C' H2C1 0.9600 . ?
C2C' H2C2 0.9600 . ?
C2C' H2C3 0.9600 . ?
 
loop_
 _geom_angle_atom_site_label_1
 _geom_angle_atom_site_label_2
 _geom_angle_atom_site_label_3
 _geom_angle
 _geom_angle_site_symmetry_1
 _geom_angle_site_symmetry_3
 _geom_angle_publ_flag
C6A N1A N2A 116.9(4) . . ?
C3A N2A N1A 123.0(4) . . ?
C3A N2A H2A 120(3) . . ?
N1A N2A H2A 117(3) . . ?
N5A C5A N4A 117.5(4) . . ?
N5A C5A C6A 121.8(4) . . ?
N4A C5A C6A 120.7(4) . . ?
C5A N5A H51A 120.0 . . ?
C5A N5A H52A 120.0 . . ?
H51A N5A H52A 120.0 . . ?
C5A N4A C3A 116.4(4) . . ?
N3A C3A N4A 119.9(5) . . ?
N3A C3A N2A 118.7(4) . . ?
N4A C3A N2A 121.4(5) . . ?
C3A N3A H32A 120.0 . . ?
C3A N3A H31A 120.0 . . ?
H32A N3A H31A 120.0 . . ?
N1A C6A C5A 120.7(4) . . ?
N1A C6A C61A 116.7(4) . . ?
C5A C6A C61A 122.6(4) . . ?
C66A C61A C62A 118.5(5) . . ?
C66A C61A C6A 119.9(5) . . ?
C62A C61A C6A 121.7(4) . . ?
C63A C62A C61A 120.1(5) . . ?
C63A C62A Cl1A 120.8(4) . . ?
C61A C62A Cl1A 119.1(4) . . ?
C62A C63A C64A 120.3(5) . . ?
C62A C63A Cl2A 120.8(5) . . ?
C64A C63A Cl2A 118.9(5) . . ?
C65A C64A C63A 119.3(5) . . ?
C65A C64A H64A 120.4 . . ?
C63A C64A H64A 120.4 . . ?
C64A C65A C66A 120.9(6) . . ?
C64A C65A H65A 119.6 . . ?
C66A C65A H65A 119.6 . . ?
C65A C66A C61A 121.0(5) . . ?
C65A C66A H66A 119.5 . . ?
C61A C66A H66A 119.5 . . ?
O1B C1B O2B 124.7(5) . . ?
O1B C1B C2B 118.9(6) . . ?
O2B C1B C2B 116.4(6) . . ?
O31B C2B C2B 113.8(9) . 3_766 ?
O31B C2B C1B 117.7(7) . . ?
C2B C2B C1B 110.7(6) 3_766 . ?
O31B C2B H21B 104.4 . . ?
C2B C2B H21B 104.4 3_766 . ?
C1B C2B H21B 104.4 . . ?
S12C O1C S11C 49.3(2) . . ?
S11C C1C' H1C1 109.5 . . ?
S11C C1C' H1C2 109.5 . . ?
H1C1 C1C' H1C2 109.5 . . ?
S11C C1C' H1C3 109.5 . . ?
H1C1 C1C' H1C3 109.5 . . ?
H1C2 C1C' H1C3 109.5 . . ?
S11C C2C' H2C1 109.5 . . ?
S11C C2C' H2C2 109.5 . . ?
H2C1 C2C' H2C2 109.5 . . ?
S11C C2C' H2C3 109.5 . . ?
H2C1 C2C' H2C3 109.5 . . ?
H2C2 C2C' H2C3 109.5 . . ?
O1C S11C C1C' 107.7(4) . . ?
O1C S11C C2C' 105.6(4) . . ?
C1C' S11C C2C' 101.9(4) . . ?
 
loop_
 _geom_torsion_atom_site_label_1
 _geom_torsion_atom_site_label_2
 _geom_torsion_atom_site_label_3
 _geom_torsion_atom_site_label_4
 _geom_torsion
 _geom_torsion_site_symmetry_1
 _geom_torsion_site_symmetry_2
 _geom_torsion_site_symmetry_3
 _geom_torsion_site_symmetry_4
 _geom_torsion_publ_flag
C6A N1A N2A C3A 4.9(6) . . . . ?
N5A C5A N4A C3A -175.9(4) . . . . ?
C6A C5A N4A C3A 3.3(7) . . . . ?
C5A N4A C3A N3A -174.6(5) . . . . ?
C5A N4A C3A N2A 5.6(7) . . . . ?
N1A N2A C3A N3A 169.9(4) . . . . ?
N1A N2A C3A N4A -10.2(7) . . . . ?
N2A N1A C6A C5A 4.2(6) . . . . ?
N2A N1A C6A C61A -177.2(4) . . . . ?
N5A C5A C6A N1A 170.7(4) . . . . ?
N4A C5A C6A N1A -8.5(7) . . . . ?
N5A C5A C6A C61A -7.8(7) . . . . ?
N4A C5A C6A C61A 173.0(4) . . . . ?
N1A C6A C61A C66A -71.7(6) . . . . ?
C5A C6A C61A C66A 106.8(6) . . . . ?
N1A C6A C61A C62A 108.7(5) . . . . ?
C5A C6A C61A C62A -72.7(6) . . . . ?
C66A C61A C62A C63A 0.7(7) . . . . ?
C6A C61A C62A C63A -179.7(4) . . . . ?
C66A C61A C62A Cl1A 179.1(4) . . . . ?
C6A C61A C62A Cl1A -1.3(6) . . . . ?
C61A C62A C63A C64A -1.1(7) . . . . ?
Cl1A C62A C63A C64A -179.5(4) . . . . ?
C61A C62A C63A Cl2A -180.0(4) . . . . ?
Cl1A C62A C63A Cl2A 1.6(6) . . . . ?
C62A C63A C64A C65A 1.3(9) . . . . ?
Cl2A C63A C64A C65A -179.8(5) . . . . ?
C63A C64A C65A C66A -1.1(10) . . . . ?
C64A C65A C66A C61A 0.7(11) . . . . ?
C62A C61A C66A C65A -0.5(8) . . . . ?
C6A C61A C66A C65A 179.9(6) . . . . ?
O1B C1B C2B O31B -142.3(8) . . . . ?
O2B C1B C2B O31B 36.8(9) . . . . ?
O1B C1B C2B C2B 84.5(10) . . . 3_766 ?
O2B C1B C2B C2B -96.4(9) . . . 3_766 ?
S12C O1C S11C C1C' -53.5(5) . . . . ?
S12C O1C S11C C2C' 54.7(5) . . . . ?
 
loop_
 _geom_hbond_atom_site_label_D
 _geom_hbond_atom_site_label_H
 _geom_hbond_atom_site_label_A
 _geom_hbond_distance_DH
 _geom_hbond_distance_HA
 _geom_hbond_distance_DA
 _geom_hbond_angle_DHA
 _geom_hbond_site_symmetry_A
N2A H2A O2B  0.98(5) 1.70(5) 2.672(5) 171(4) 4_566
N3A H31A O1B  0.86 1.98 2.799(5) 158.1 4_566
N3A H32A O2B  0.86 2.07 2.913(6) 166.8 3_766
N5A H51A O1B  0.86 2.00 2.862(5) 177.0 .
N5A H52A O1C  0.86 1.98 2.800(6) 159.9 .
O32B H32B N4A  0.82 2.12 2.925(8) 168.8 .
 
_diffrn_measured_fraction_theta_max    1.000
_diffrn_reflns_theta_full              24.97
_diffrn_measured_fraction_theta_full   1.000
_refine_diff_density_max    0.237
_refine_diff_density_min   -0.209
_refine_diff_density_rms    0.056
#= = = END
